# Supplementary material for: Next-generation membrane-active glycopeptide antibiotics that also inhibit bacterial cell division
Source: Royal Society of Chemistry journal article supplement (doi:10.1039/d2sc05600c), 2023-01-01

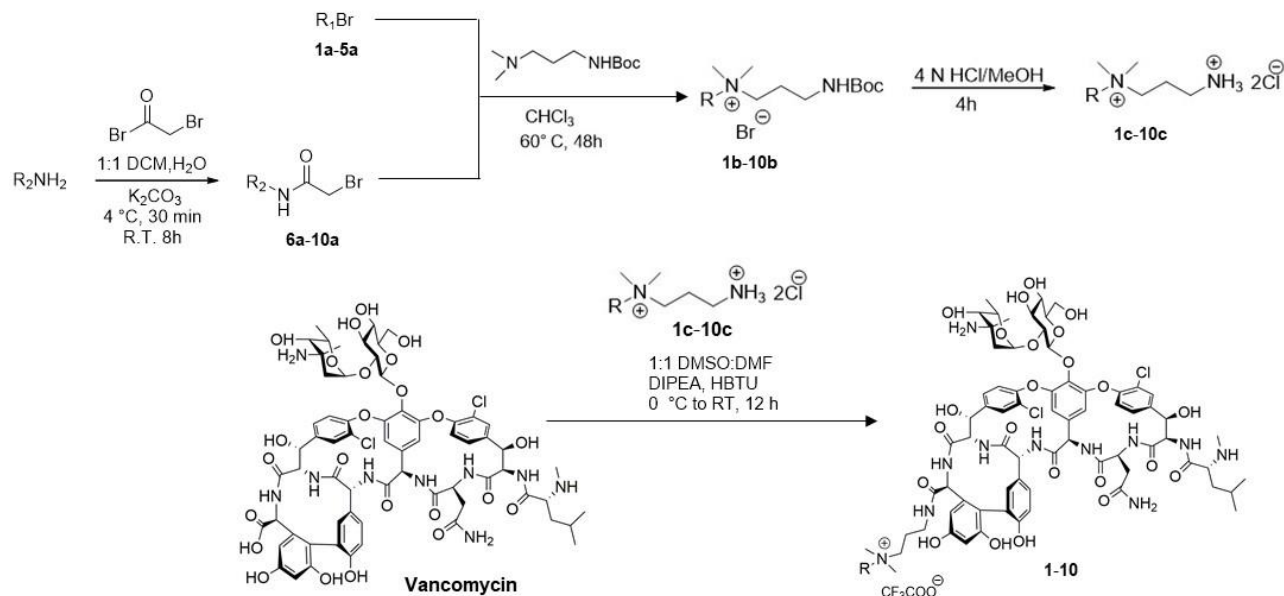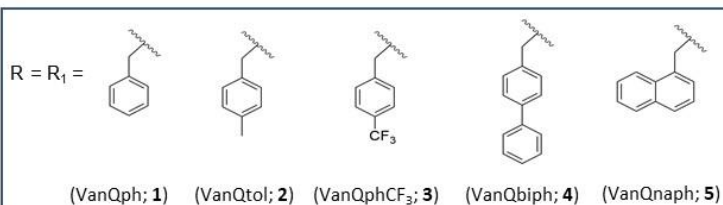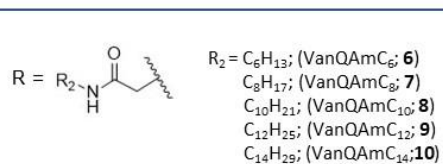

(6a)

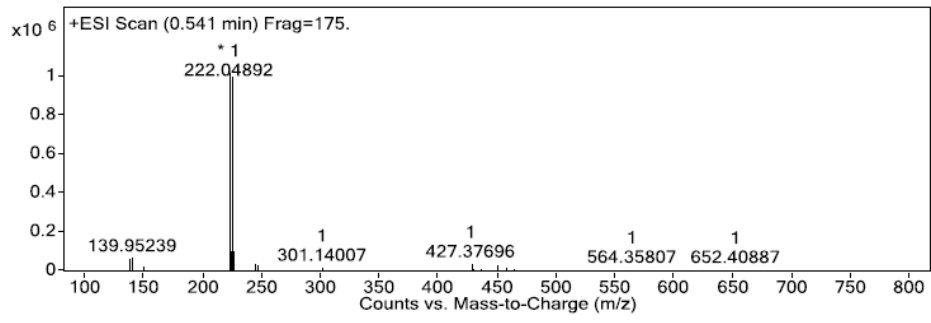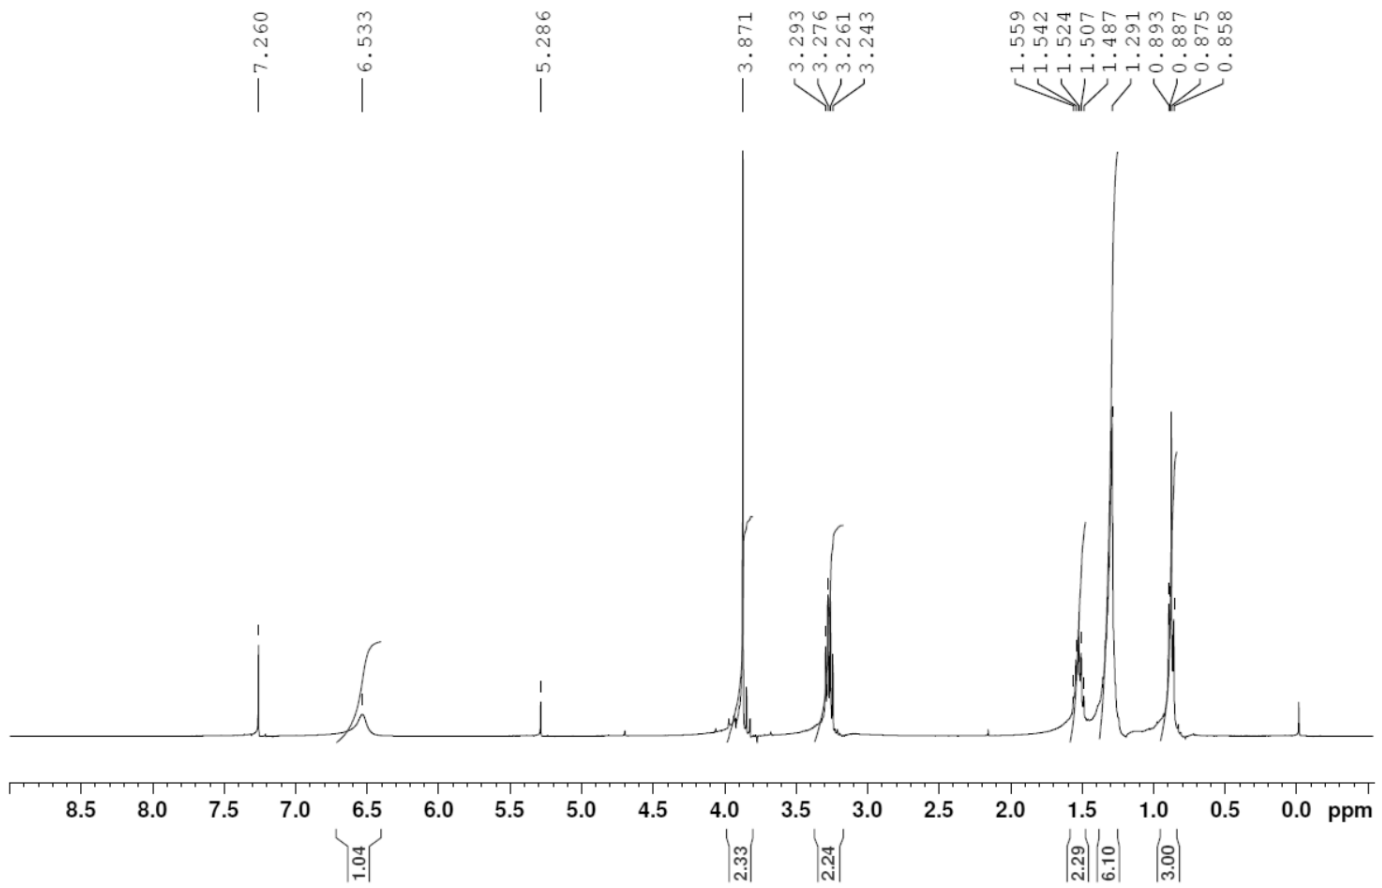

(7a)

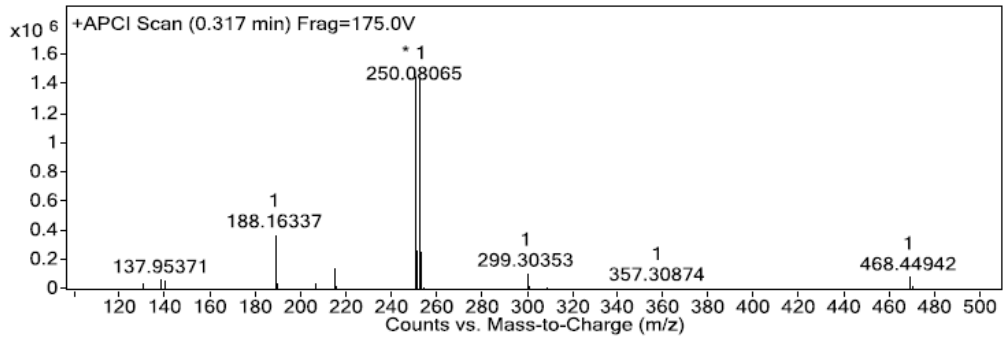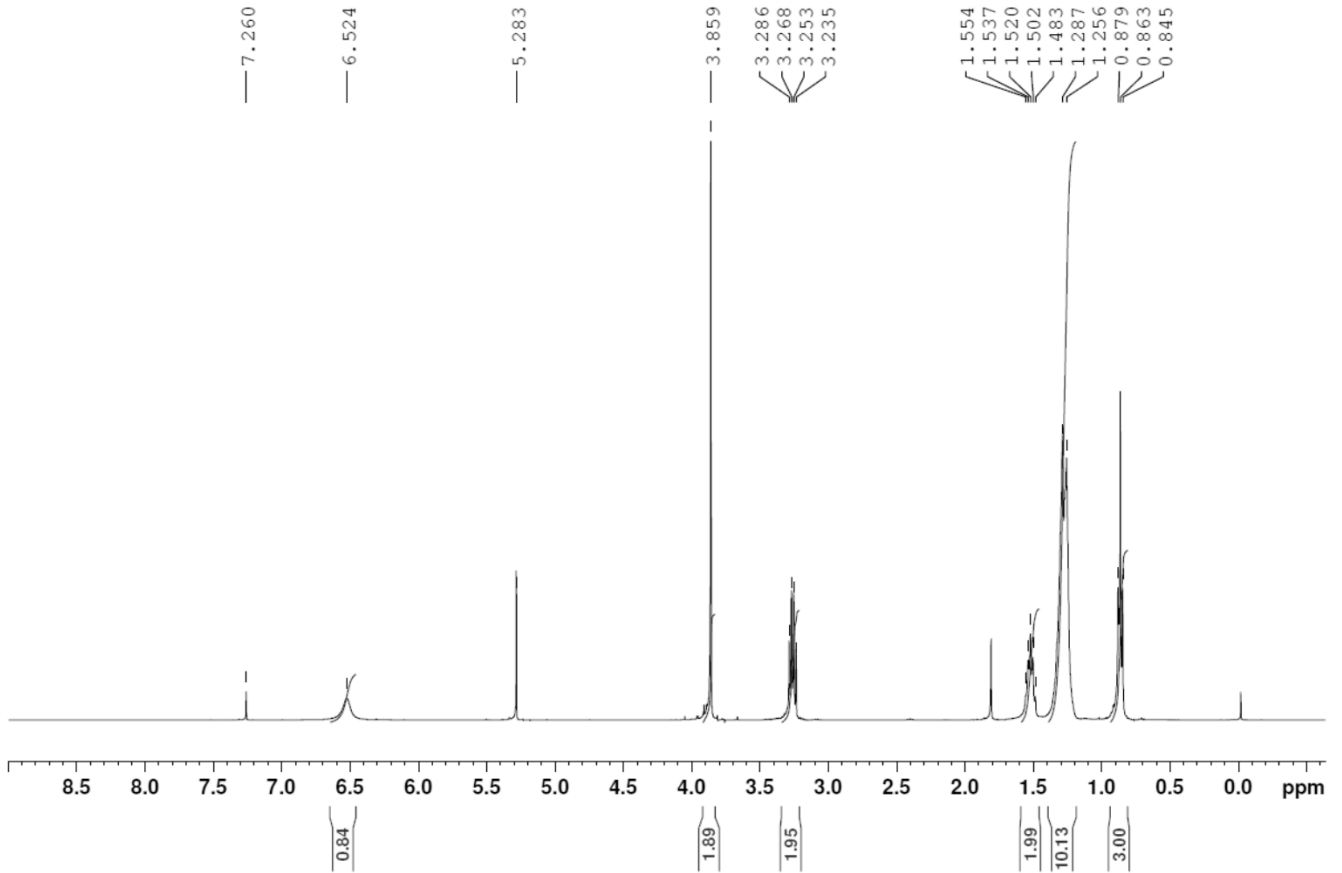

(8a)

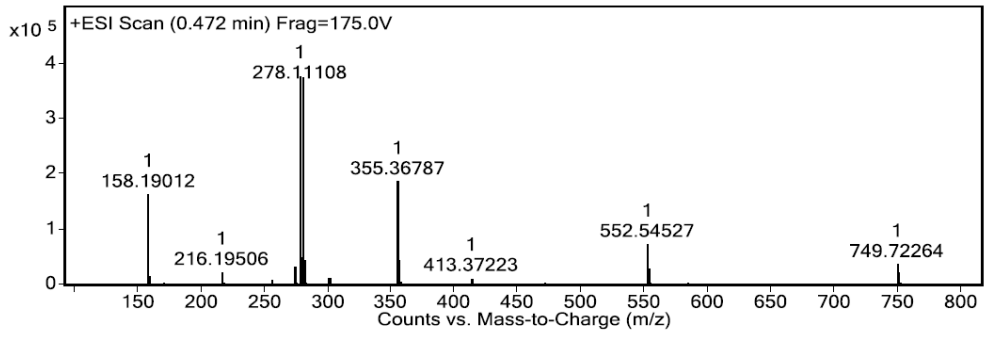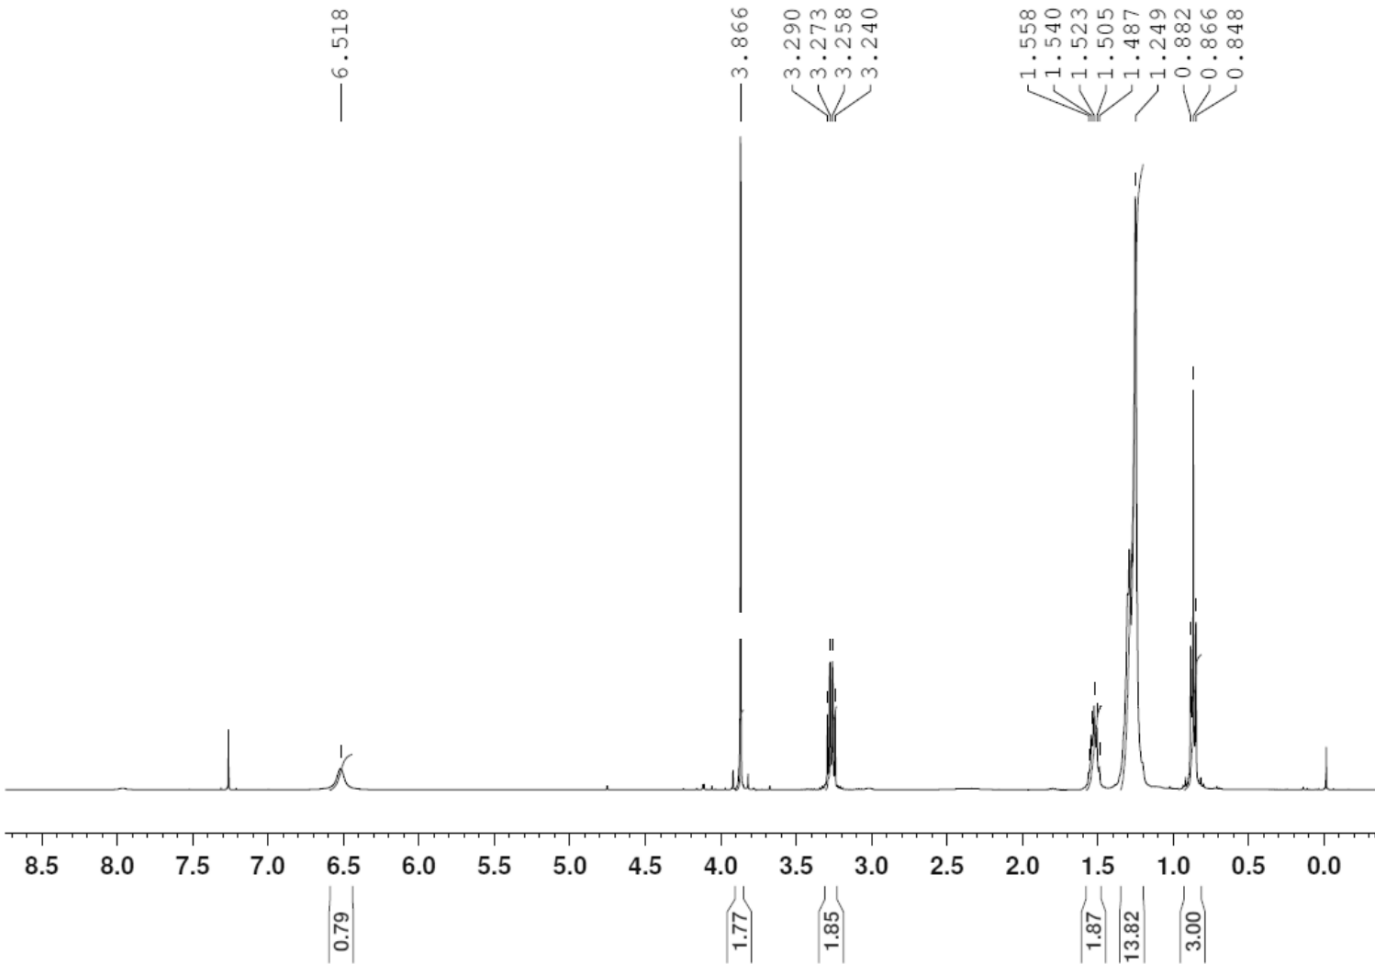

(9a)

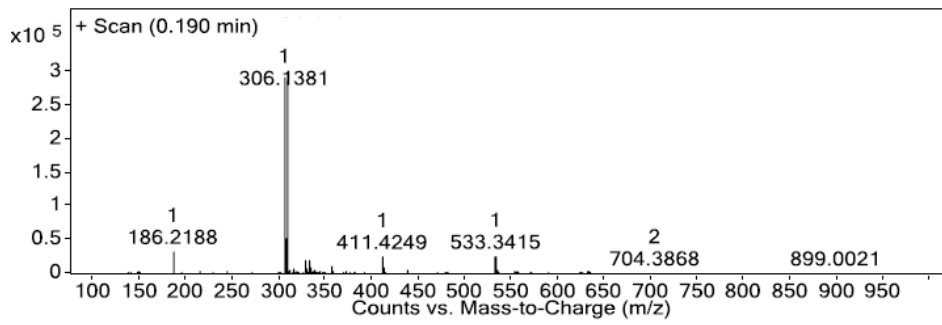

6.462

3.881

3.305

3.288

3.272

3.255

1.553

1.536

1.518

1.500

1.258

0.896

0.879

0.862

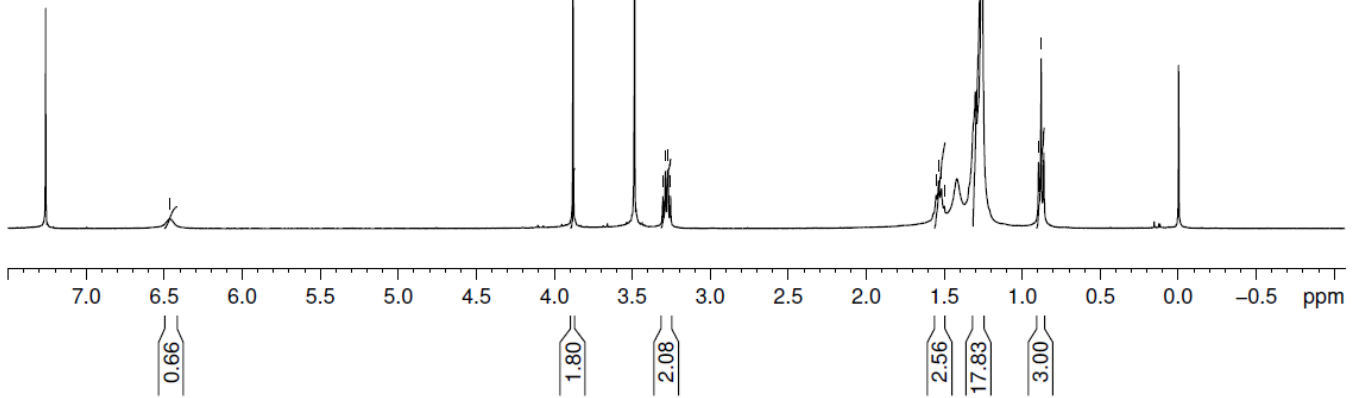

**(10a)**

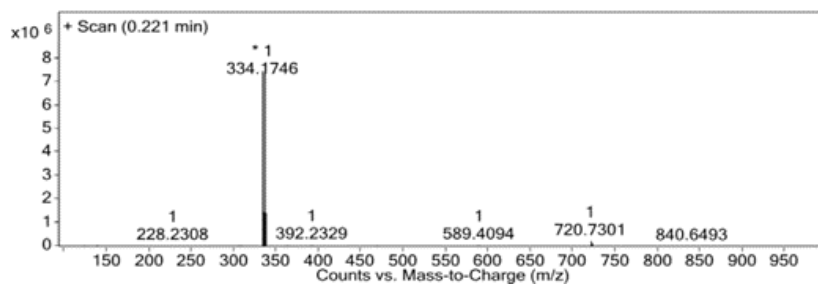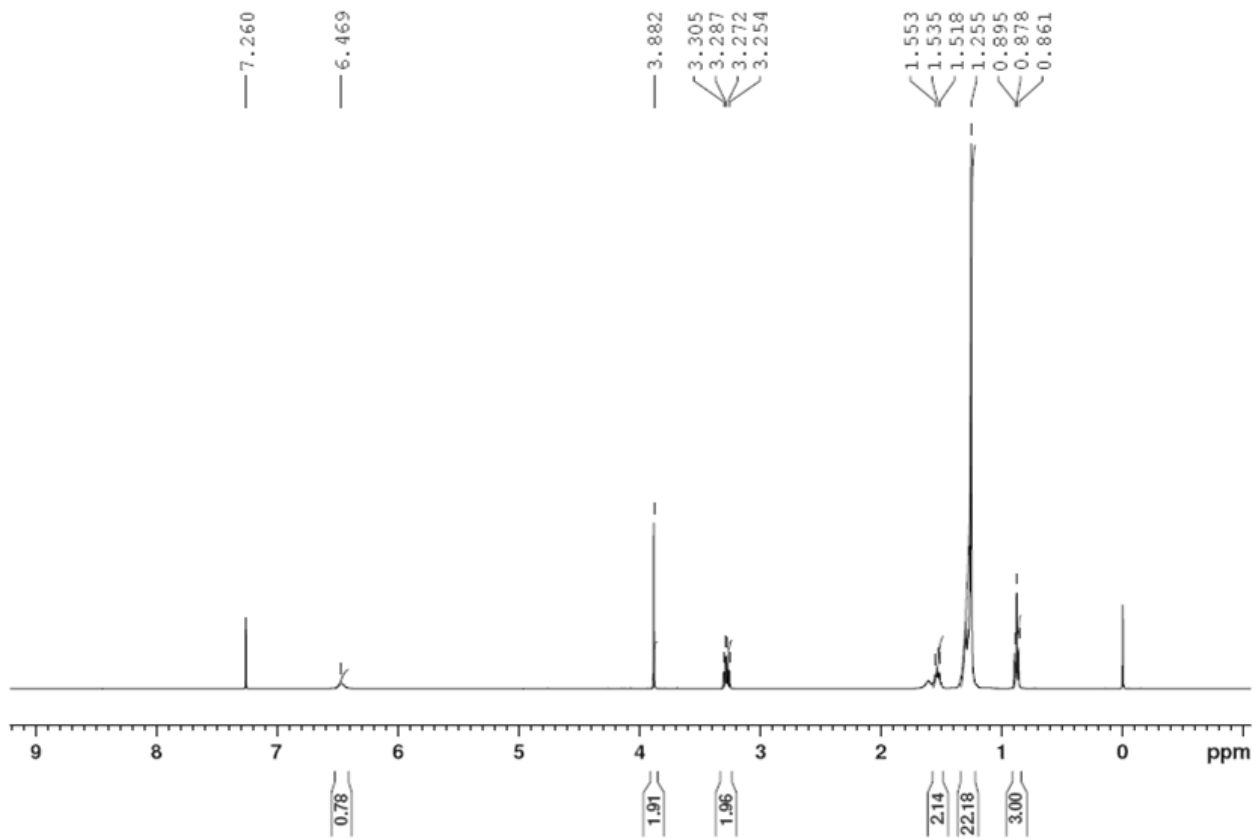

(1b)

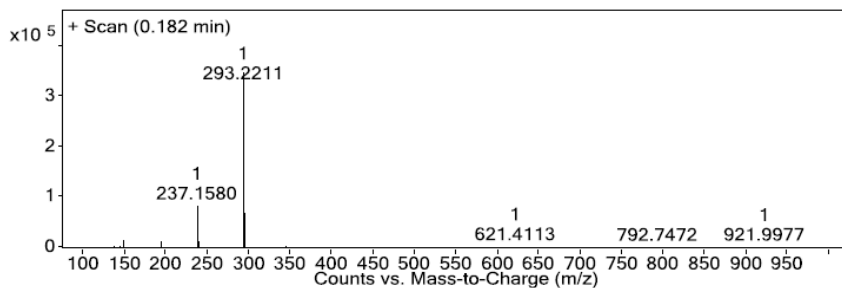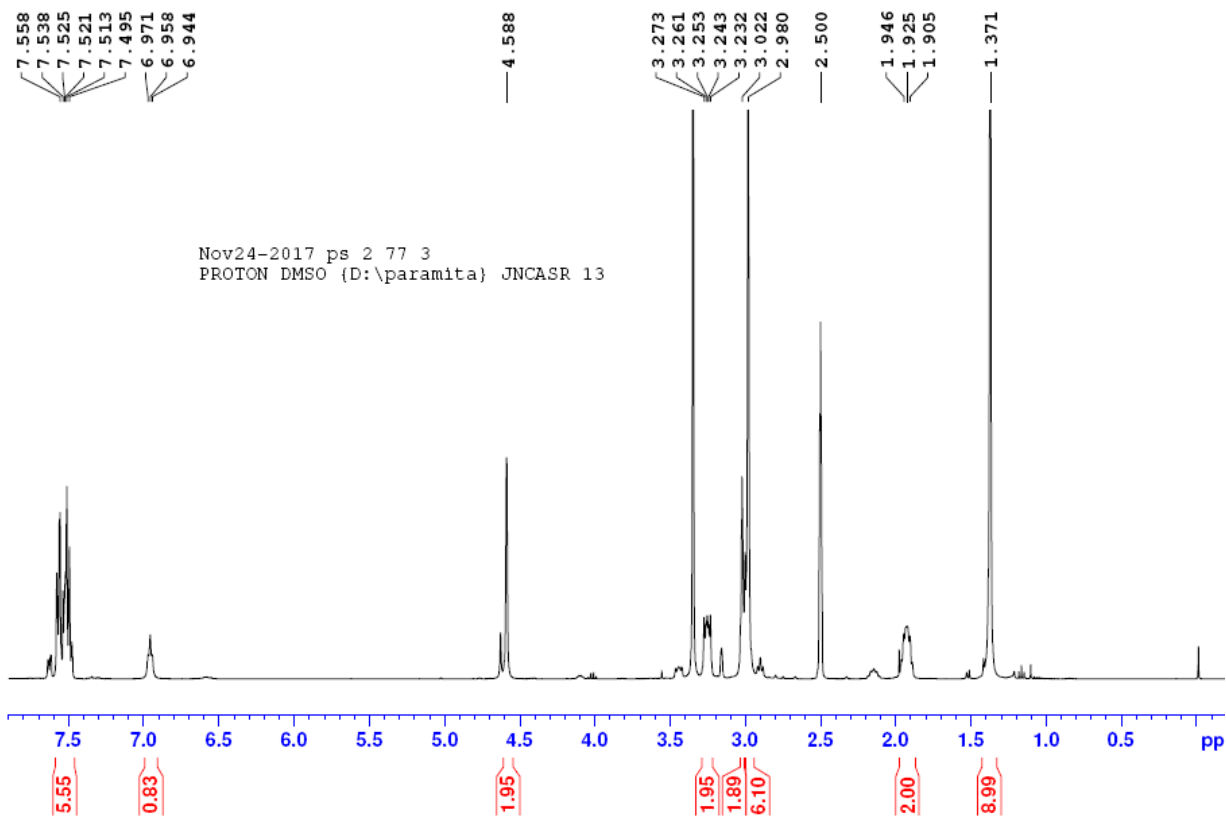

(2b)

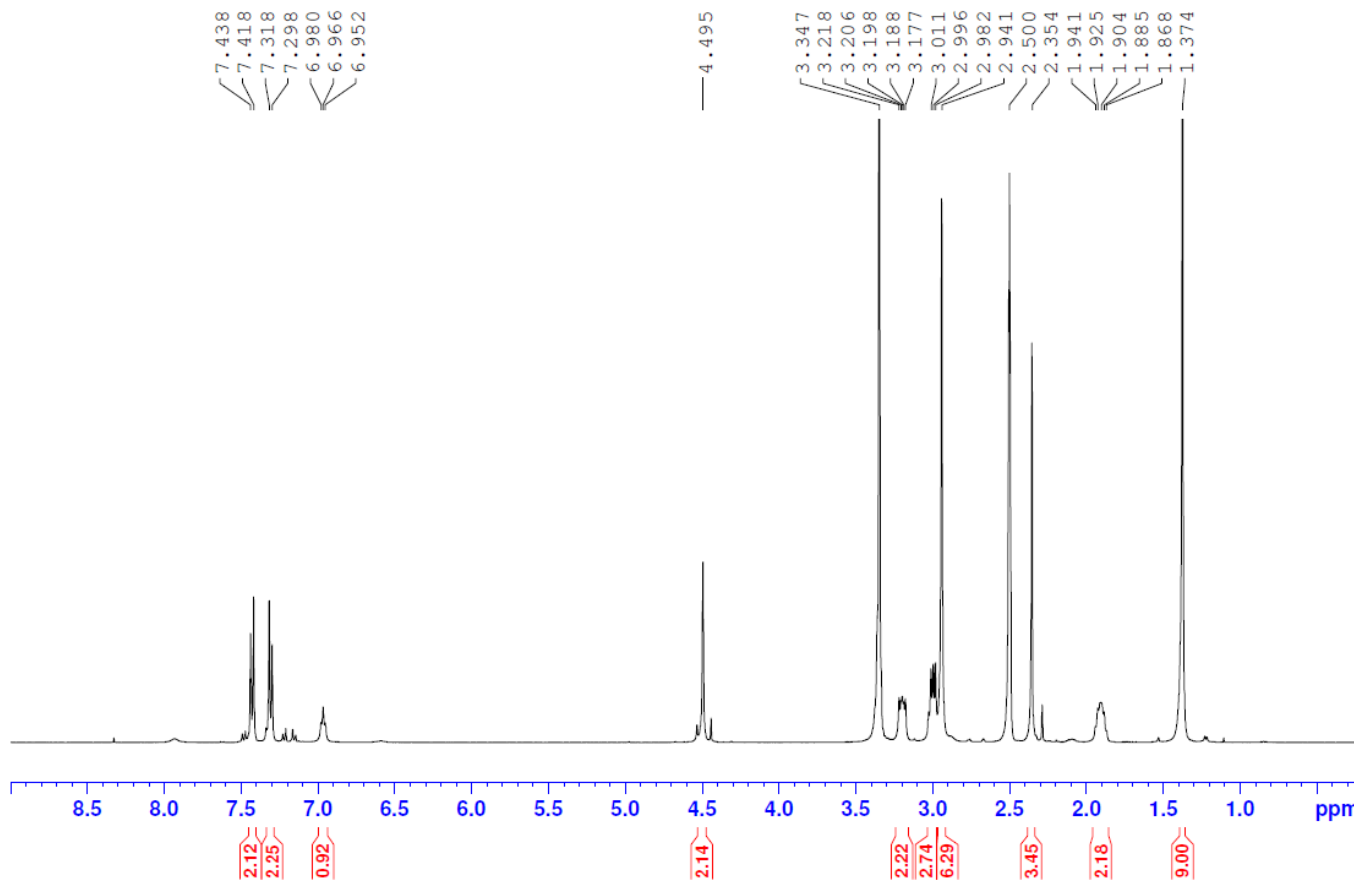



(3b)

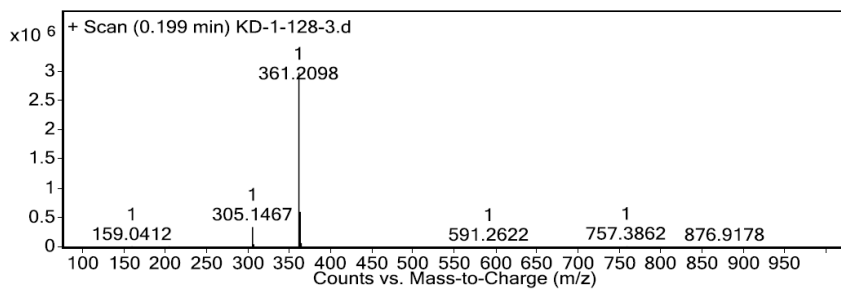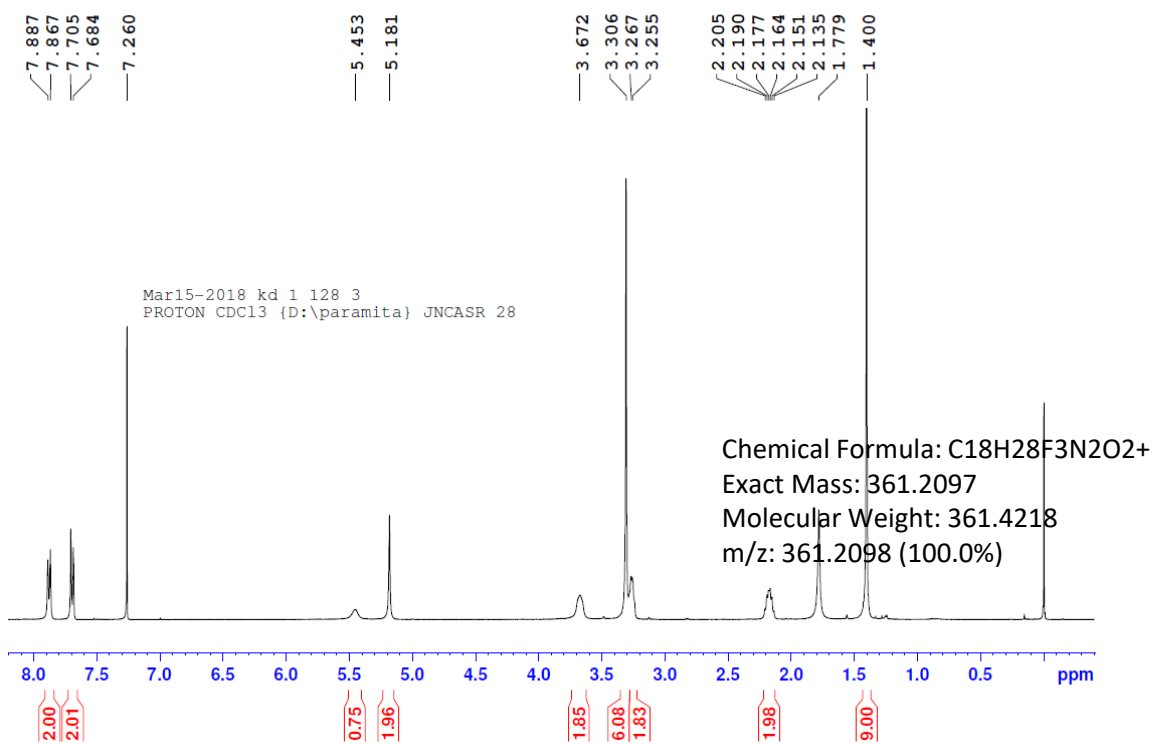

(4b)

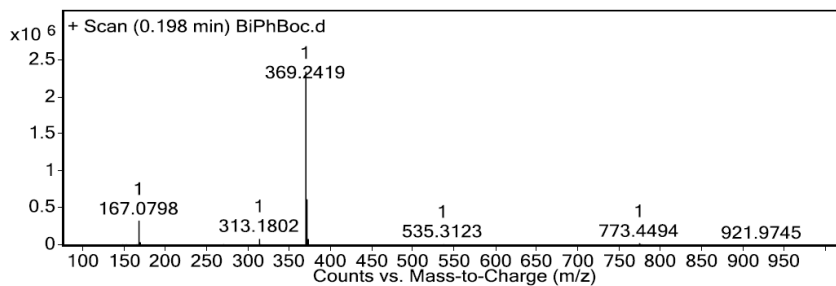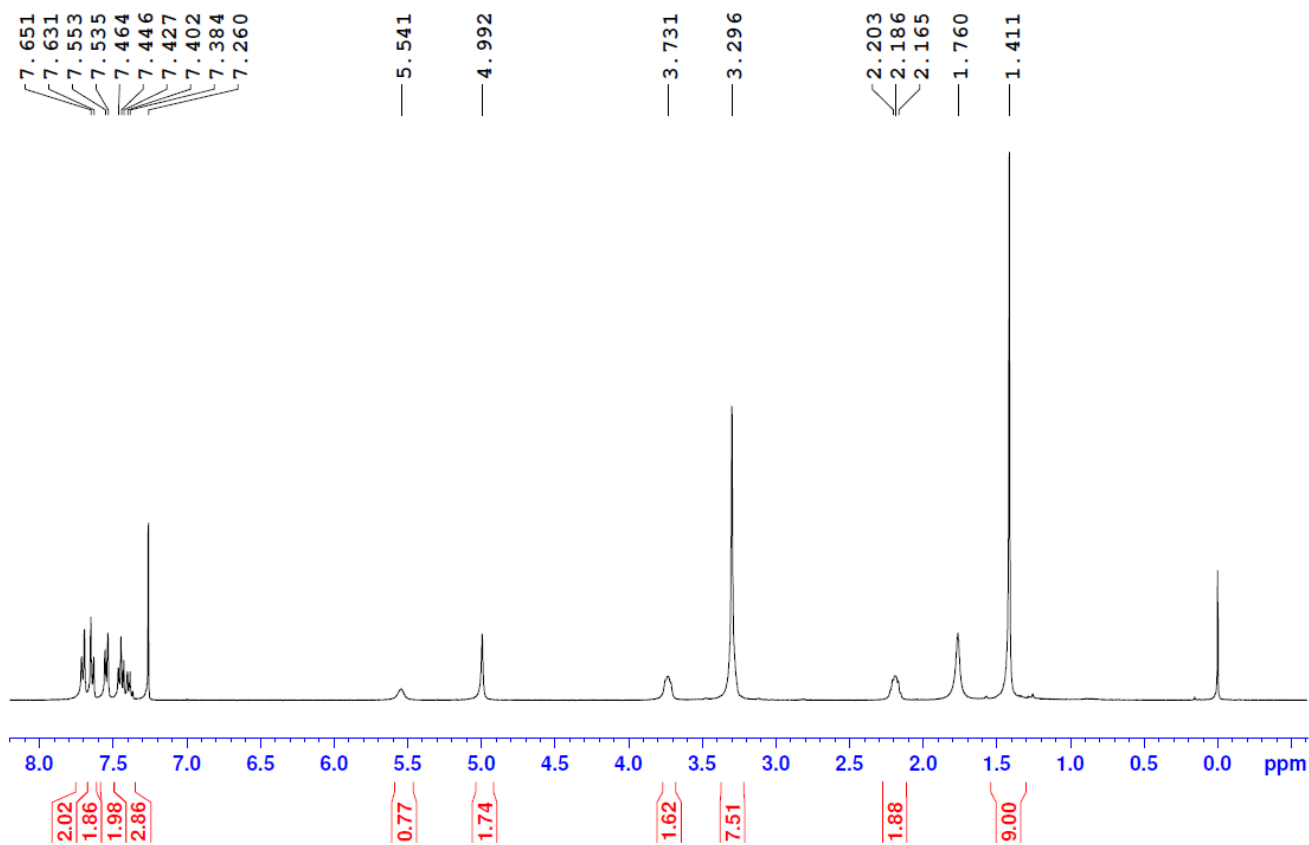

(5b)

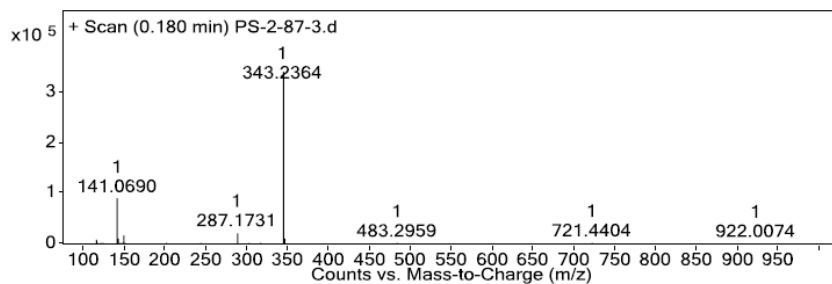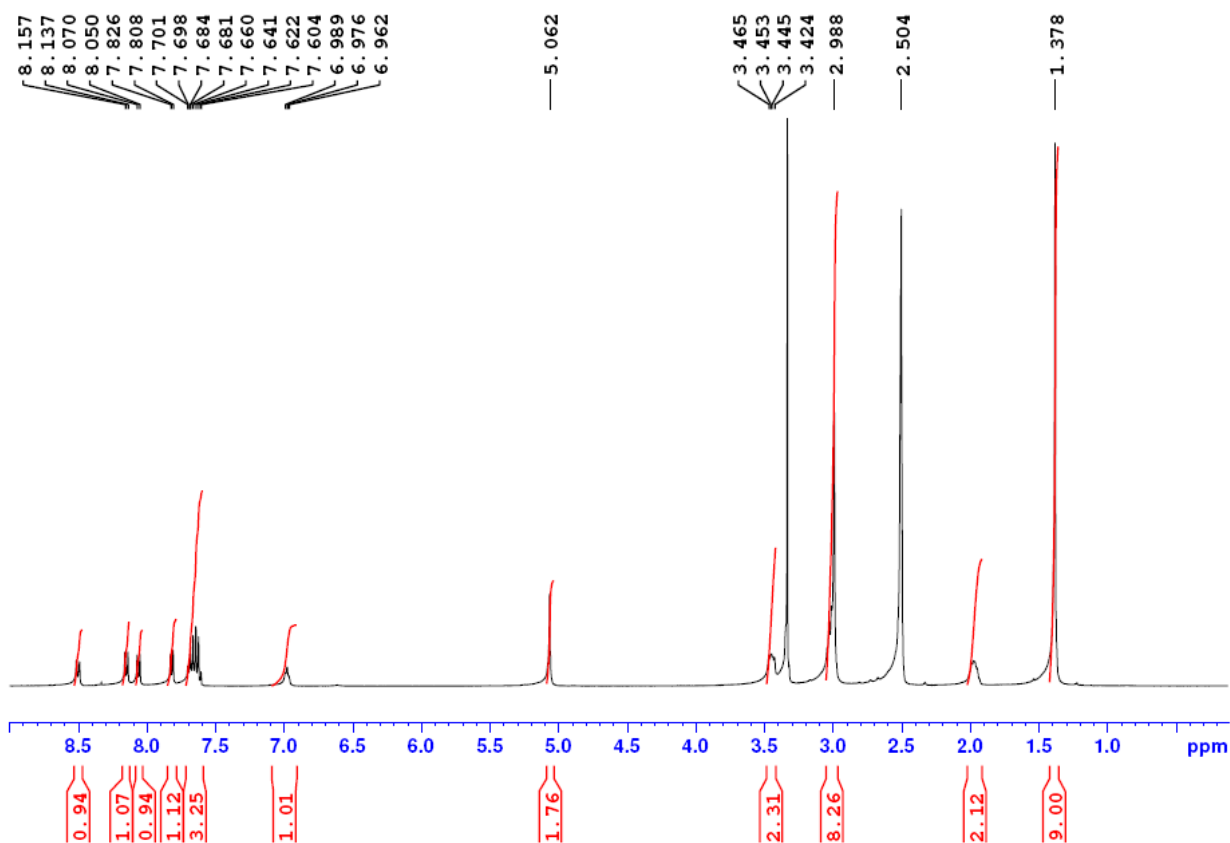

(6b)

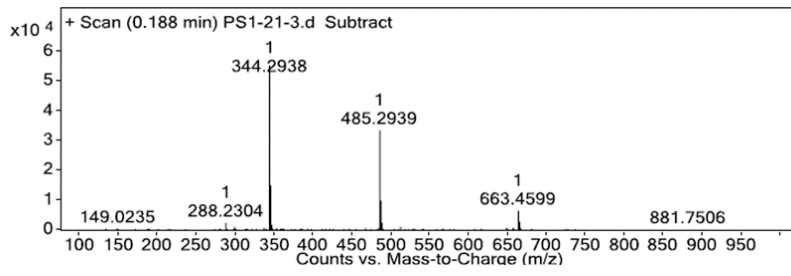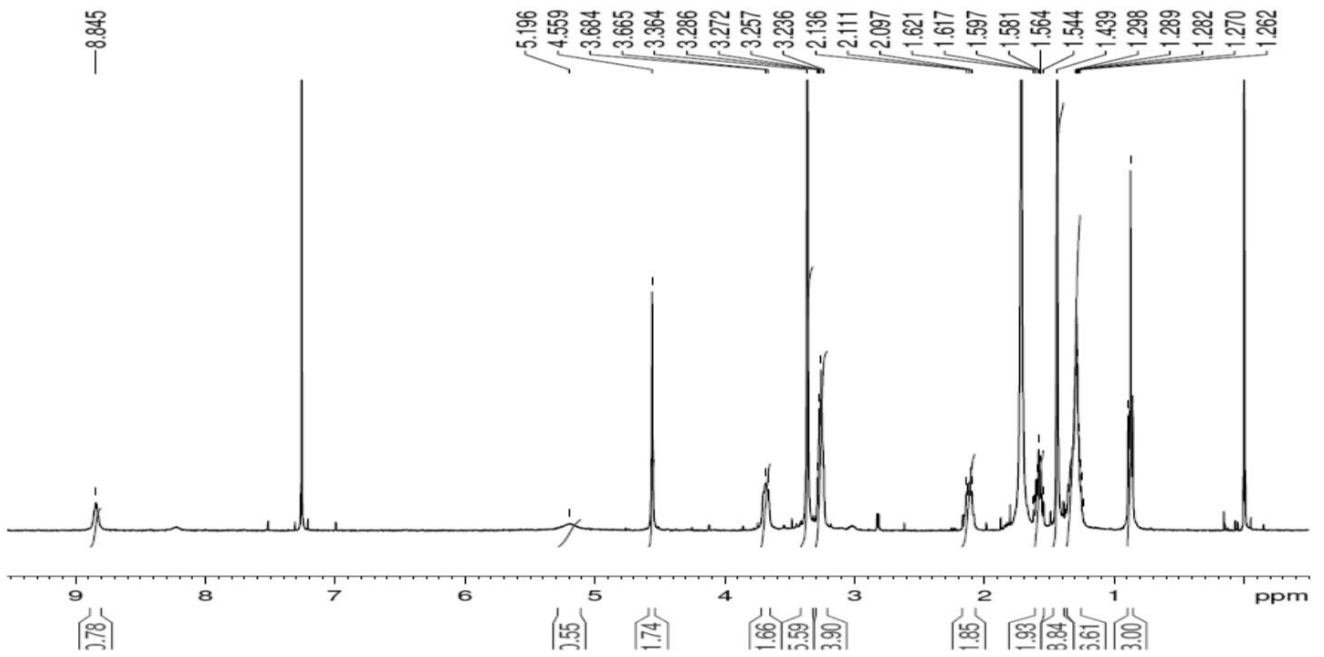

(7b)

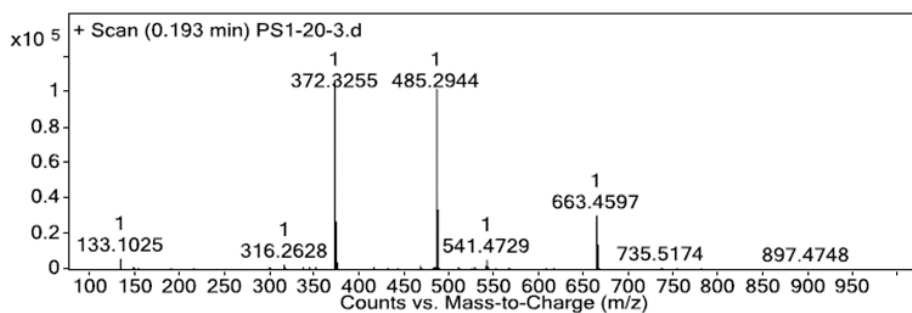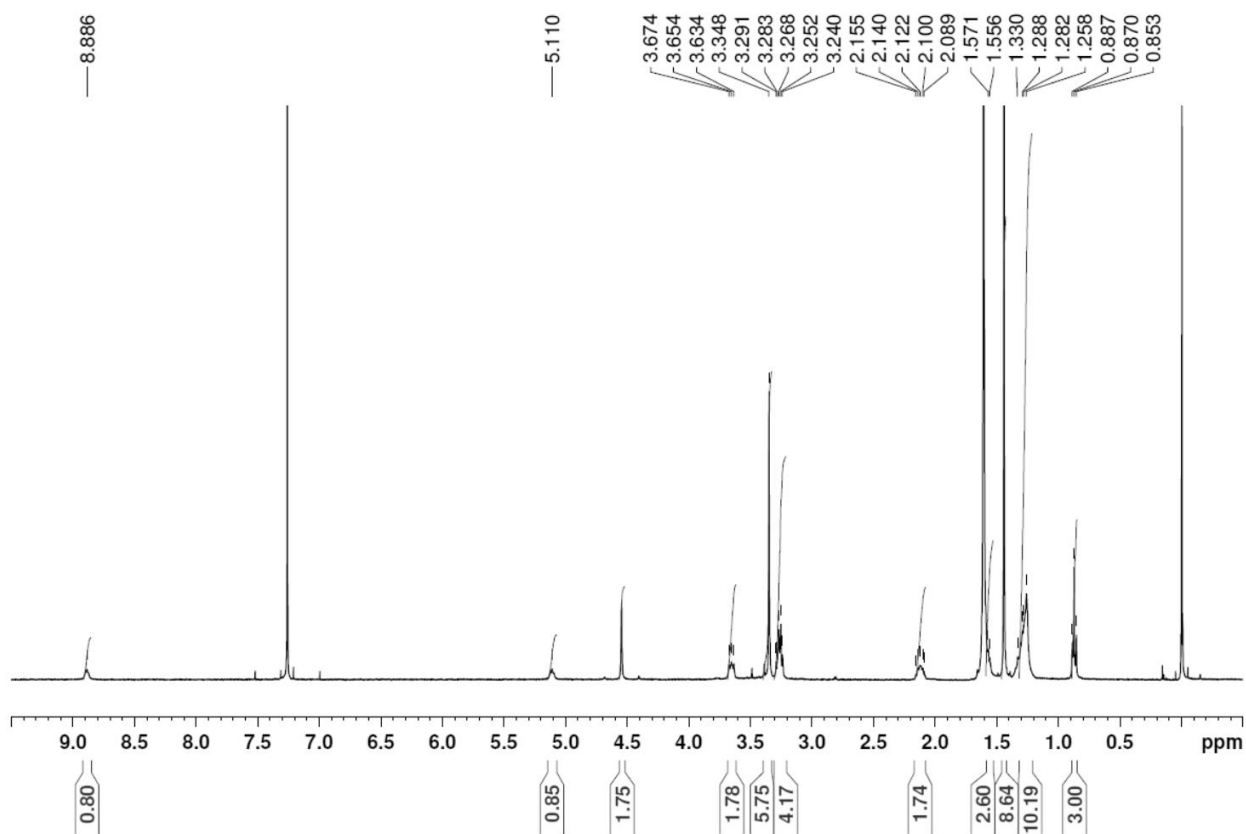

(8b)

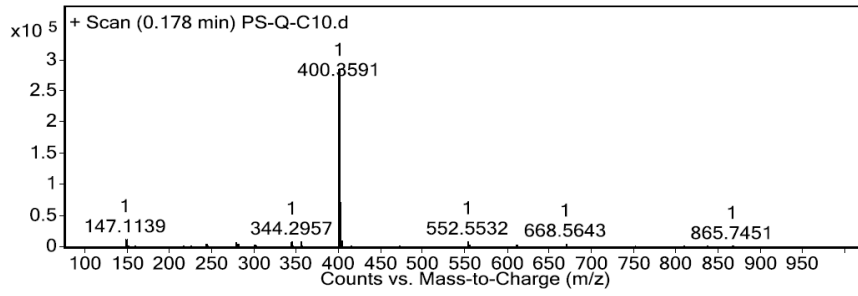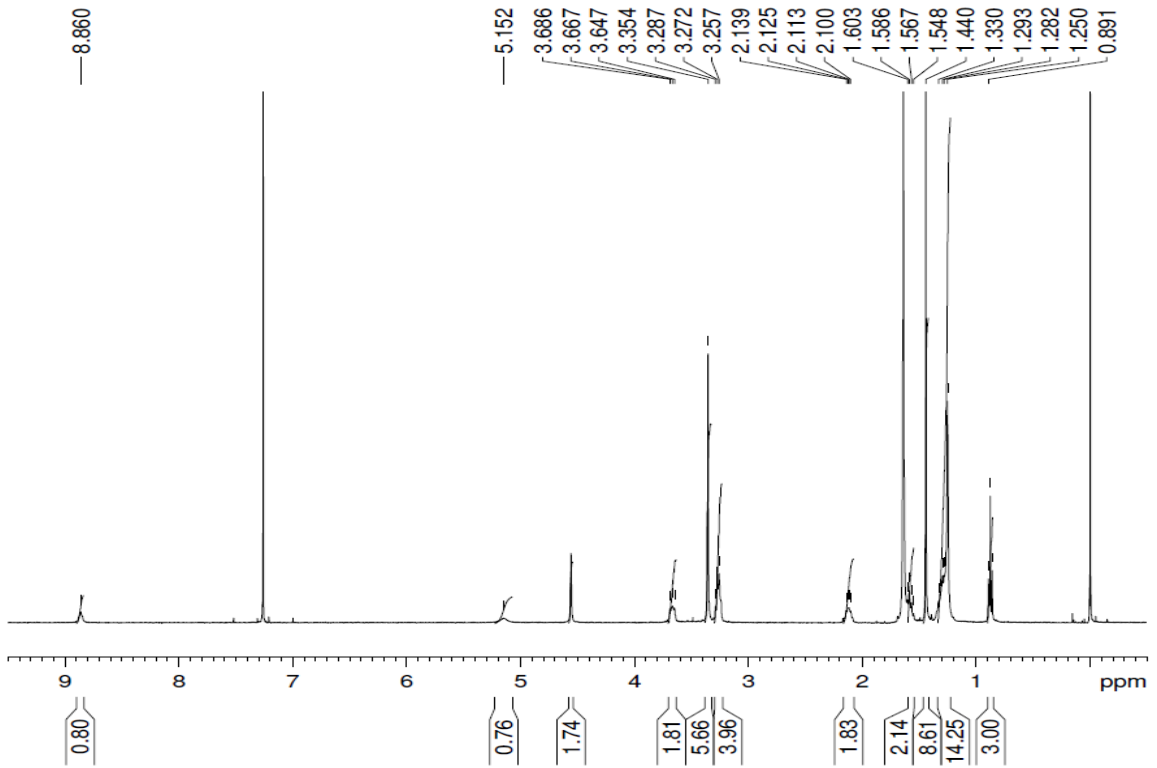

(9b)

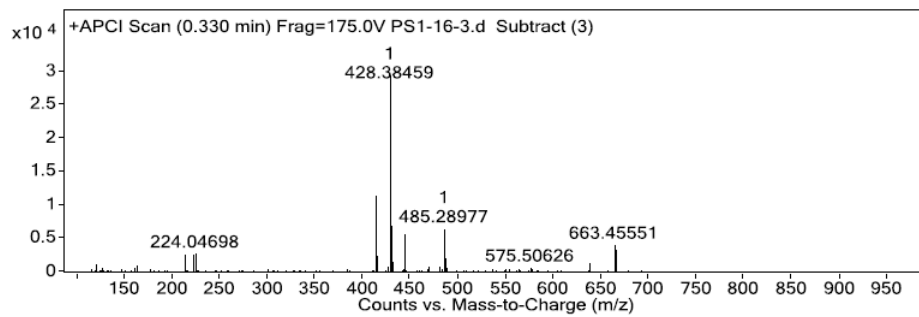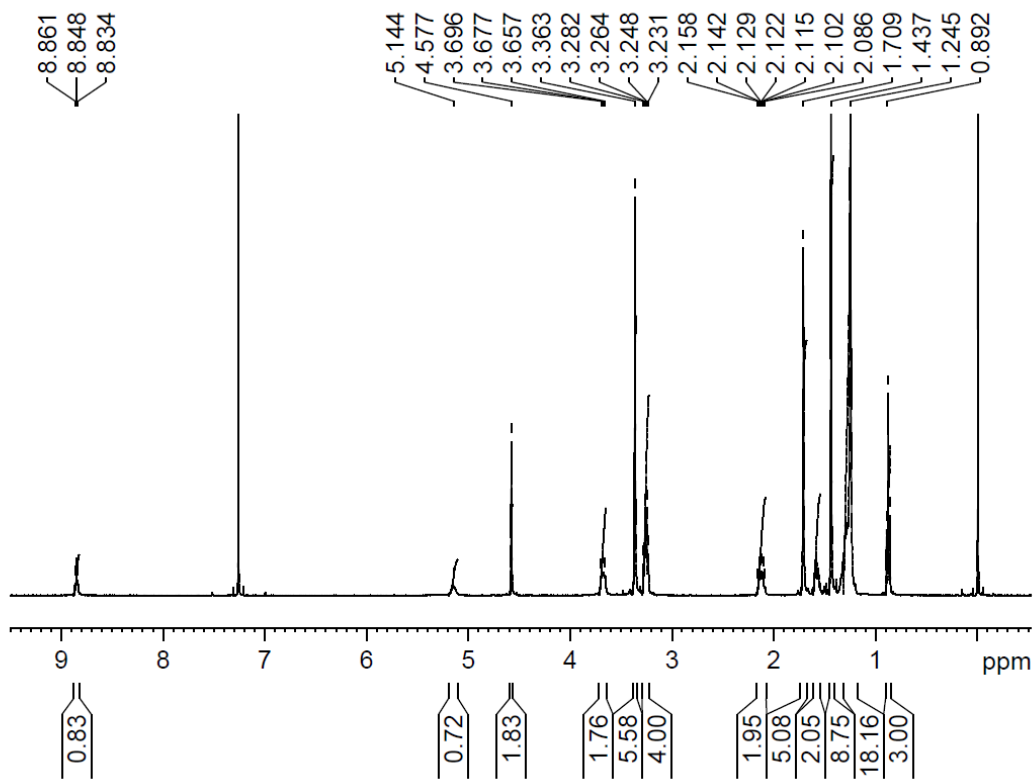

(10b)

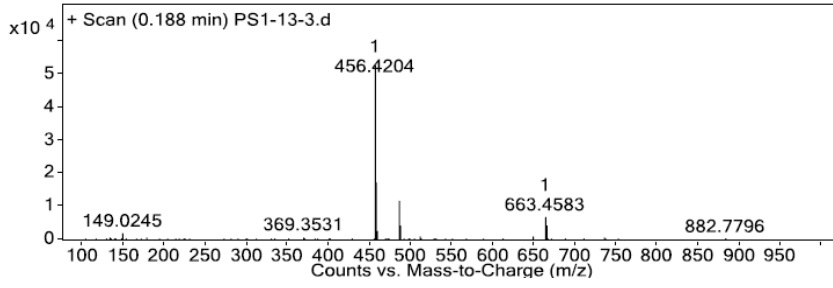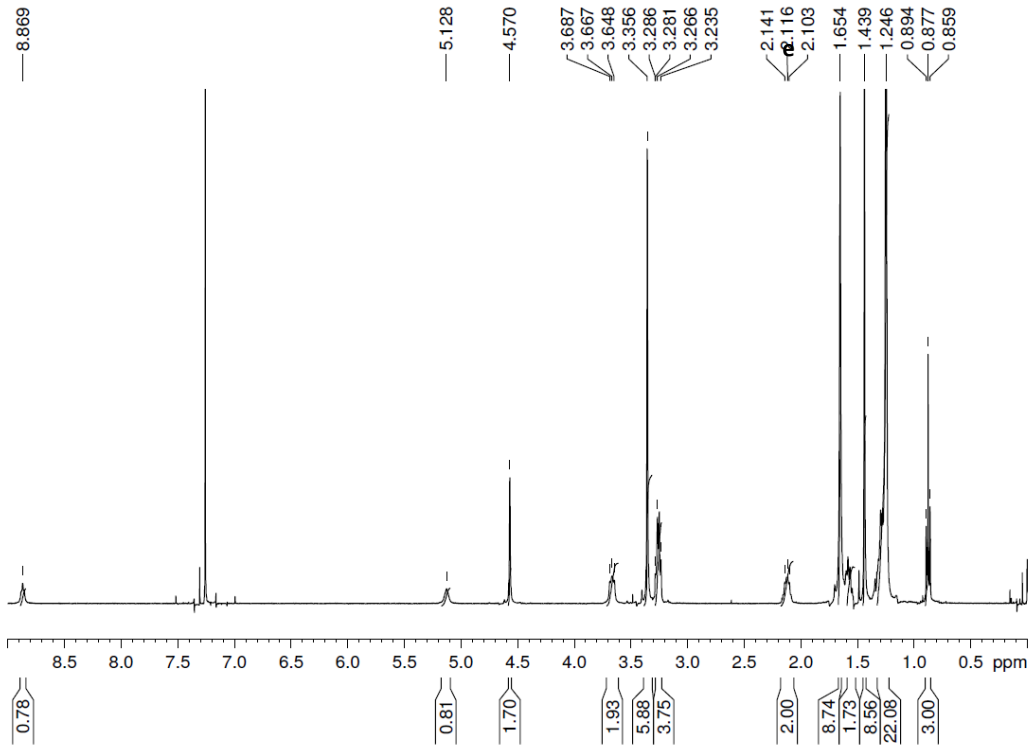



**(1c)**

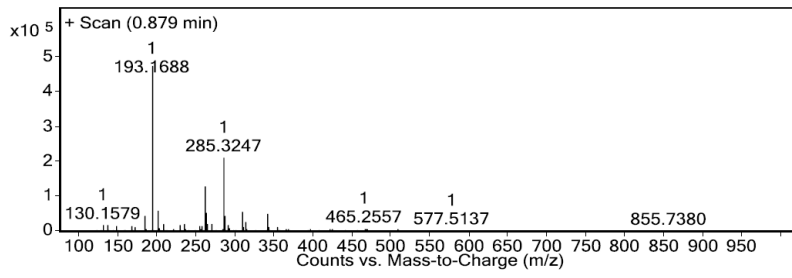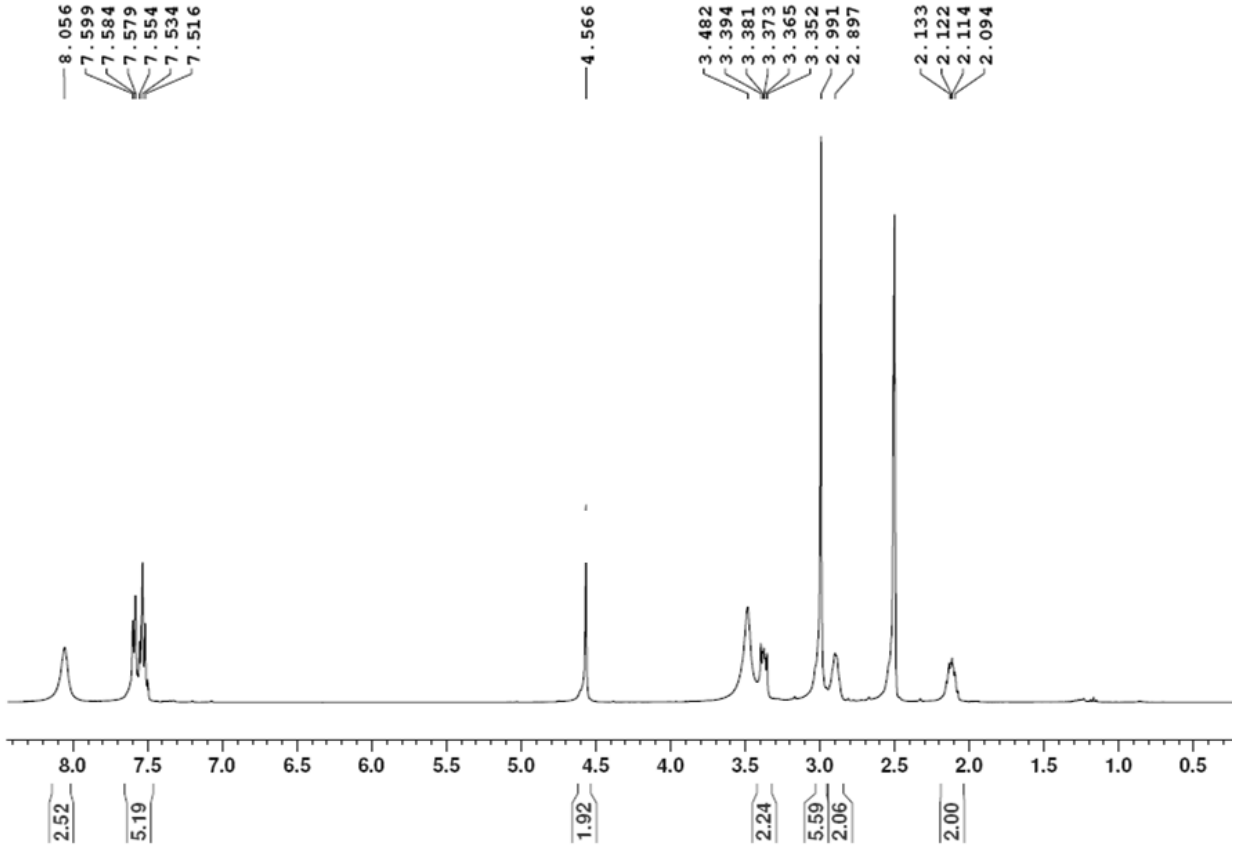

(2c)

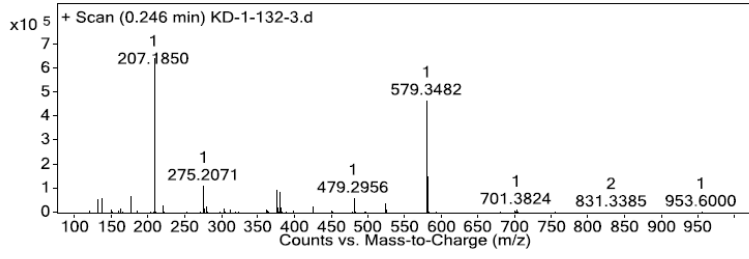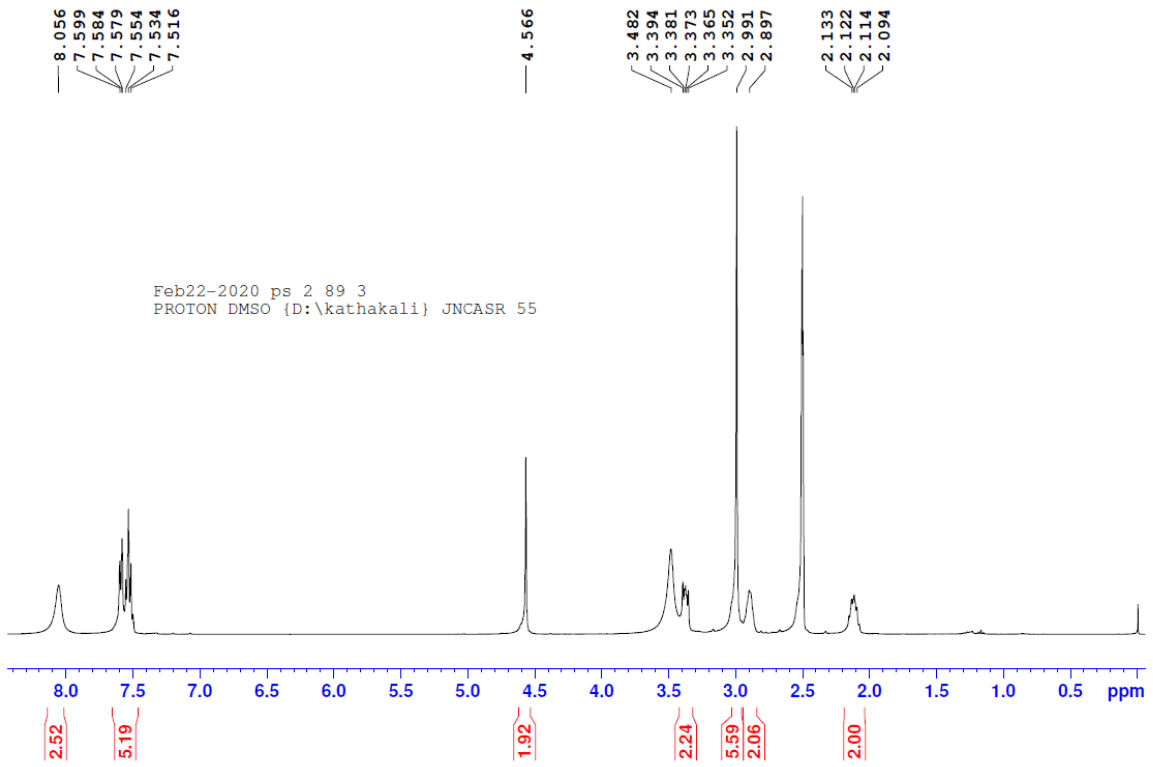

(3c)

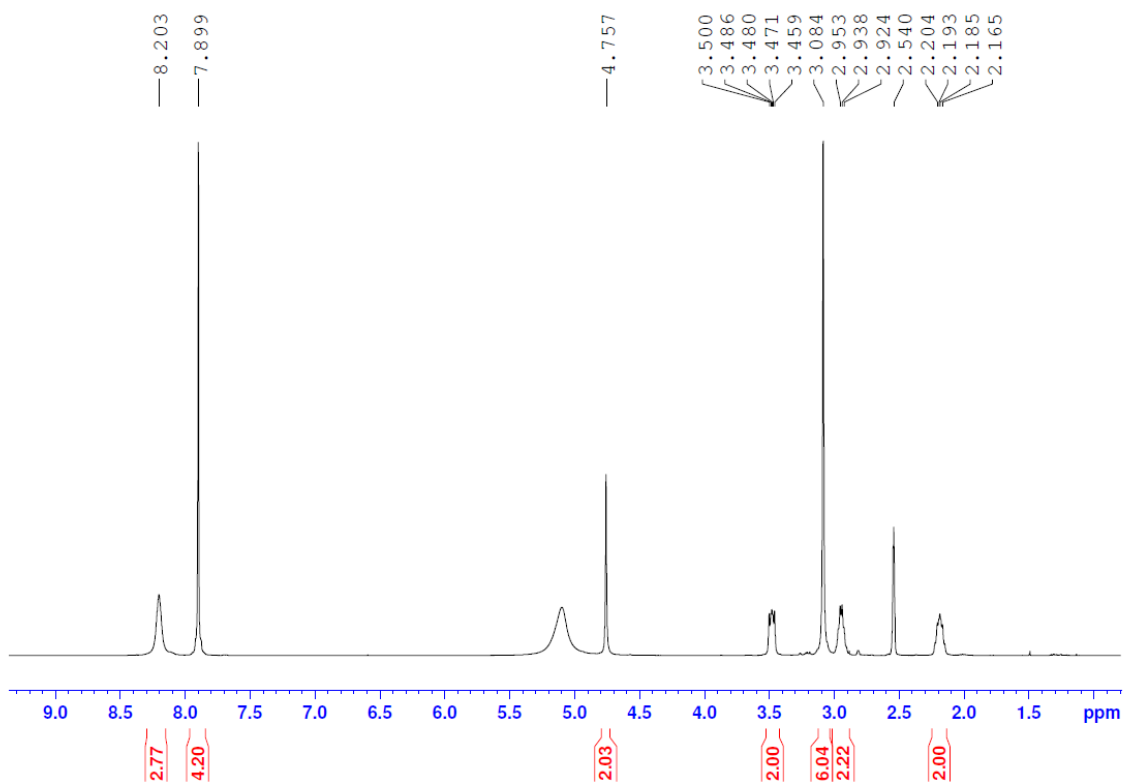

(4c)

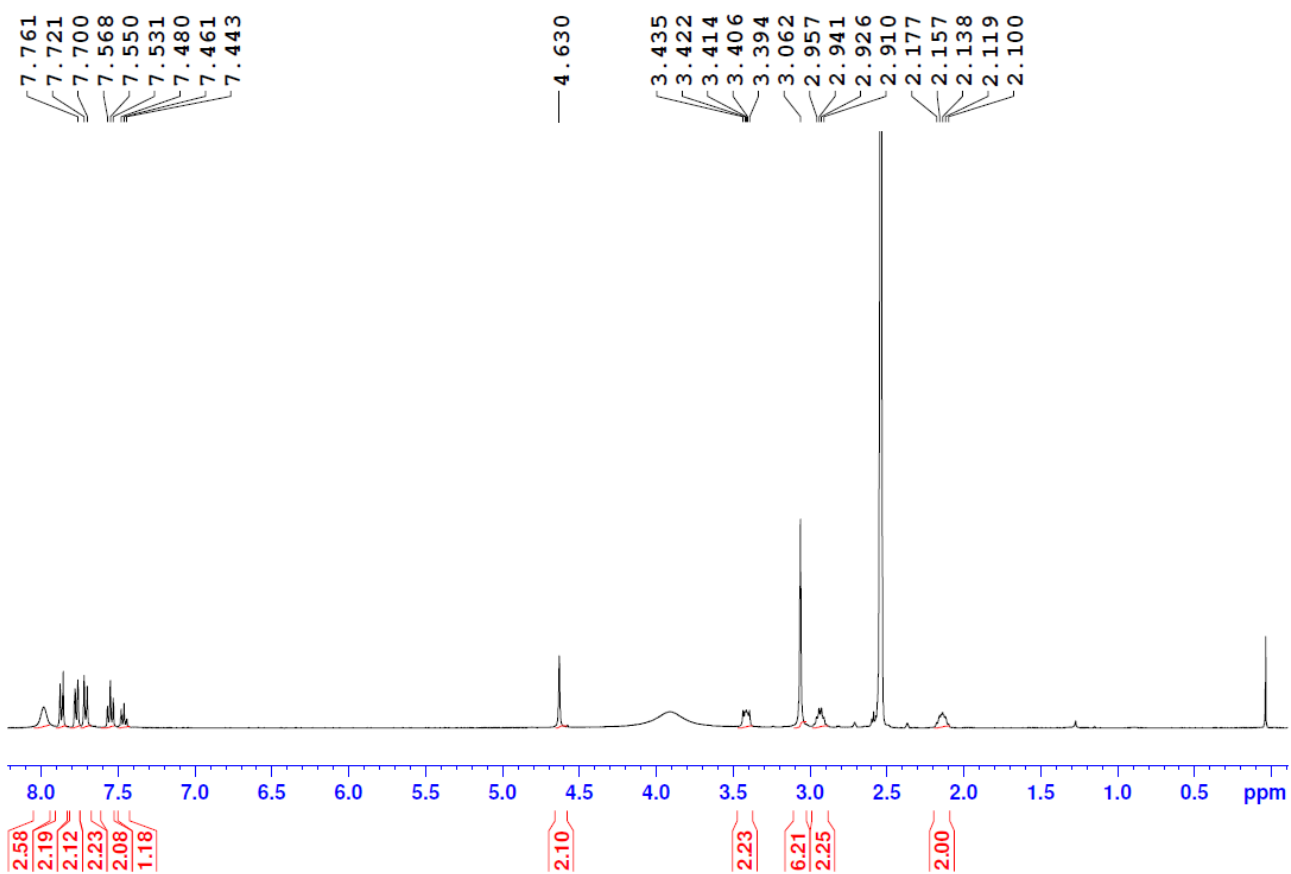

(5c)

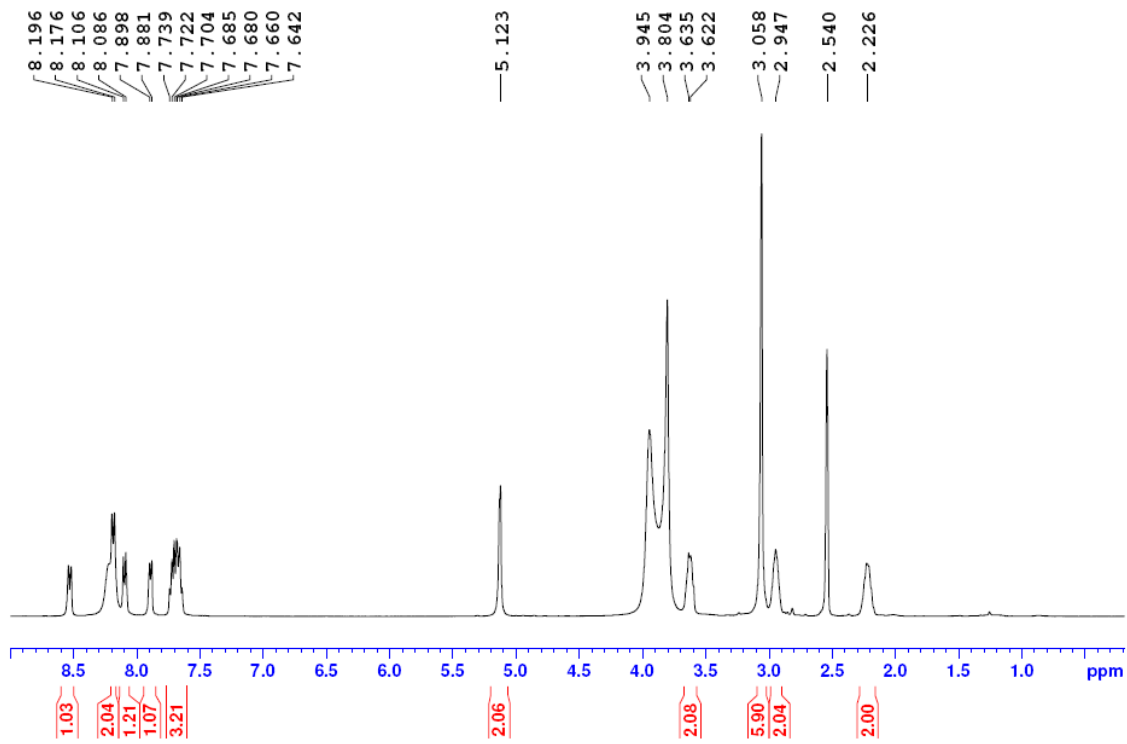

(6c)

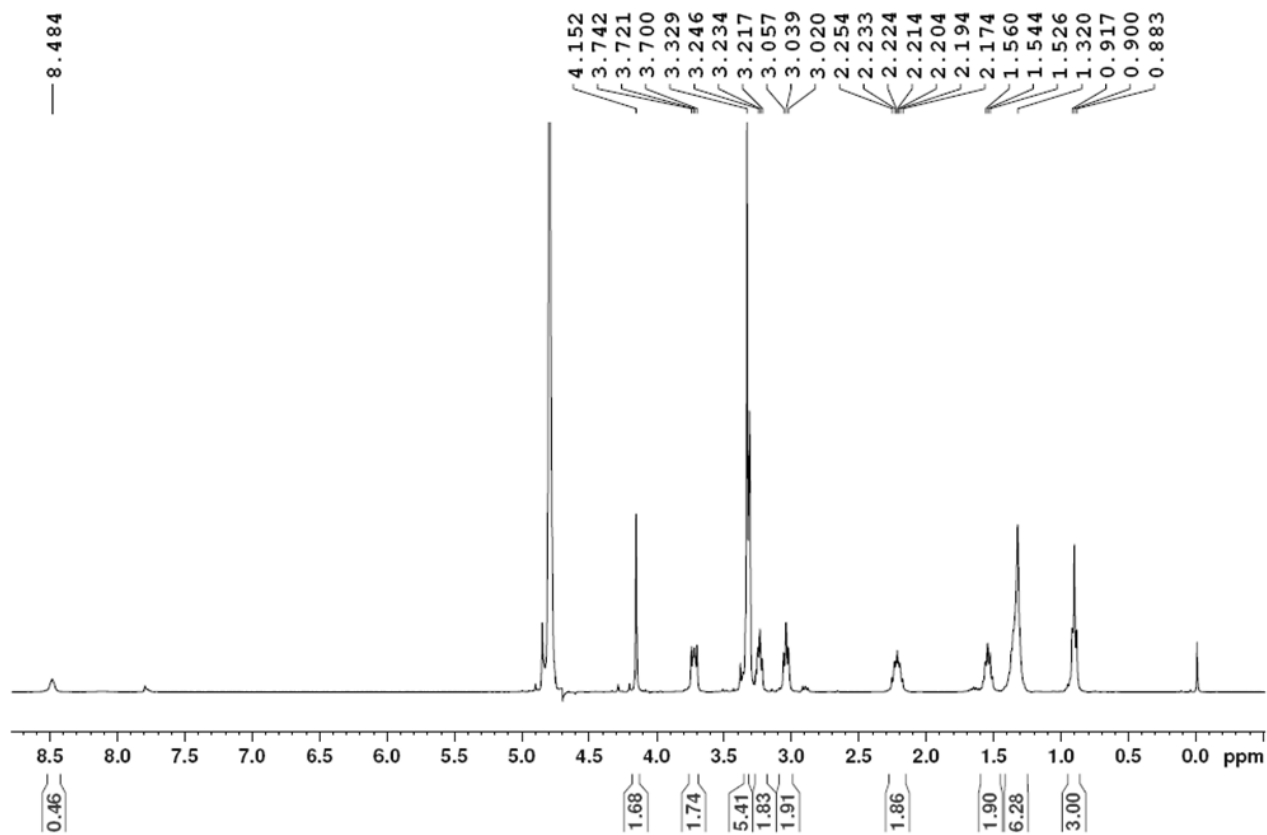

(7c)

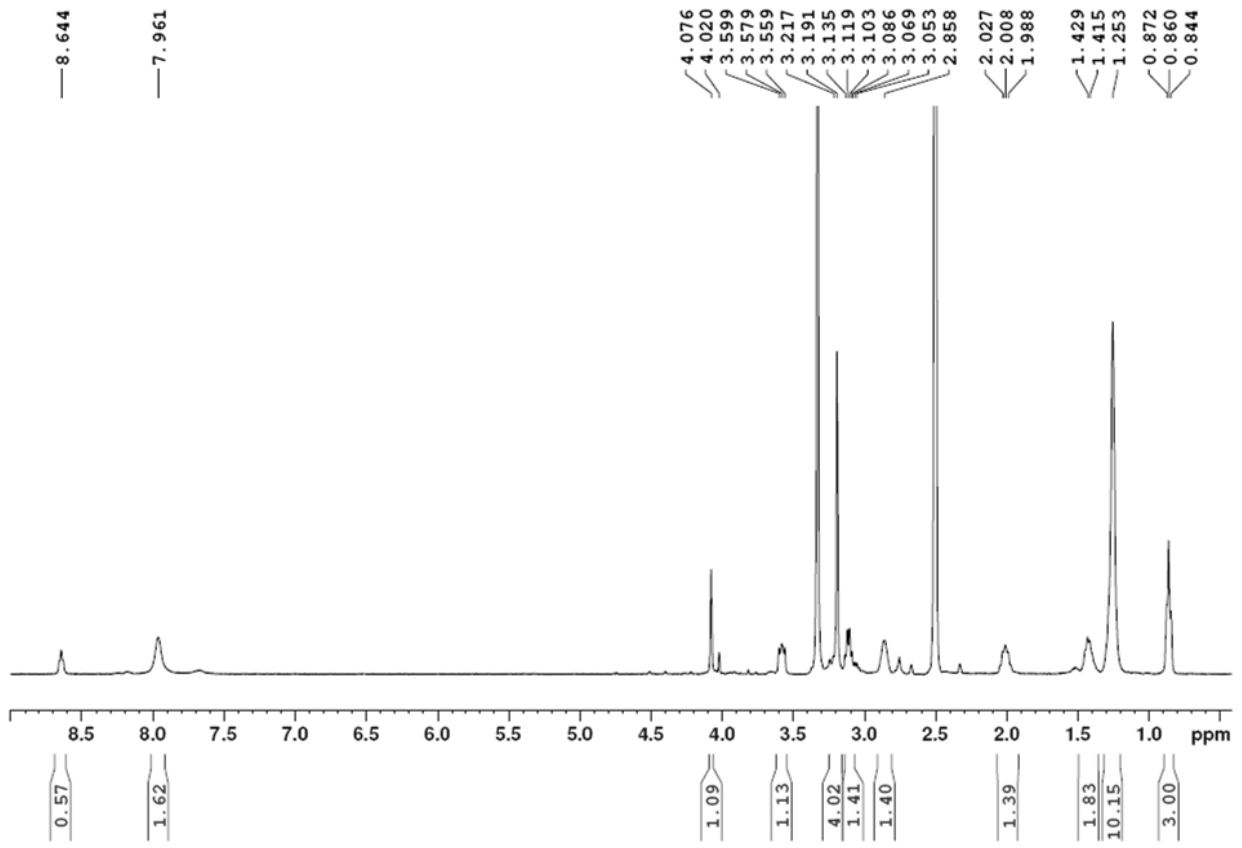

(8c)

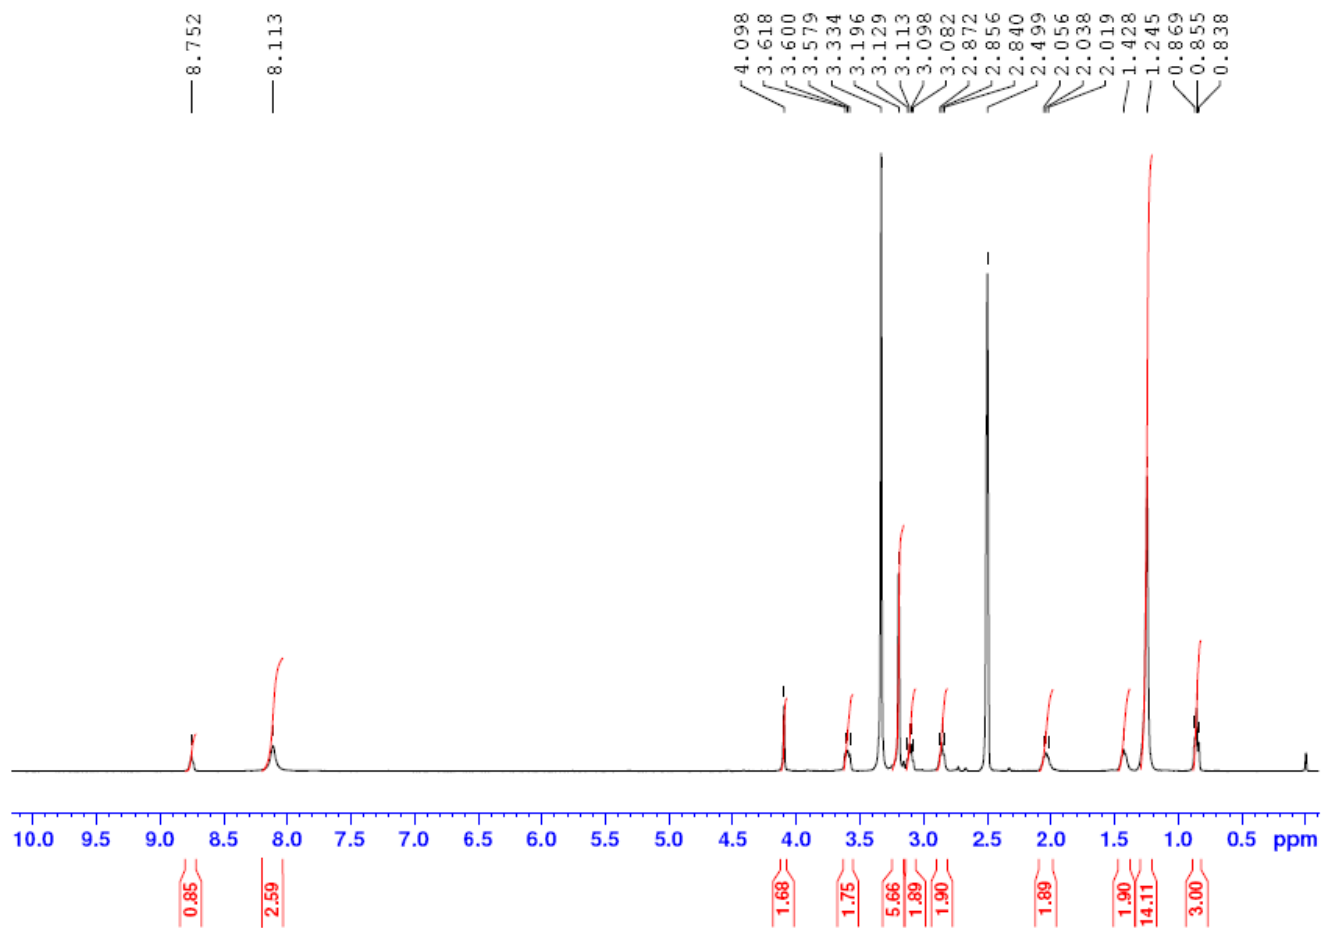



(9c)

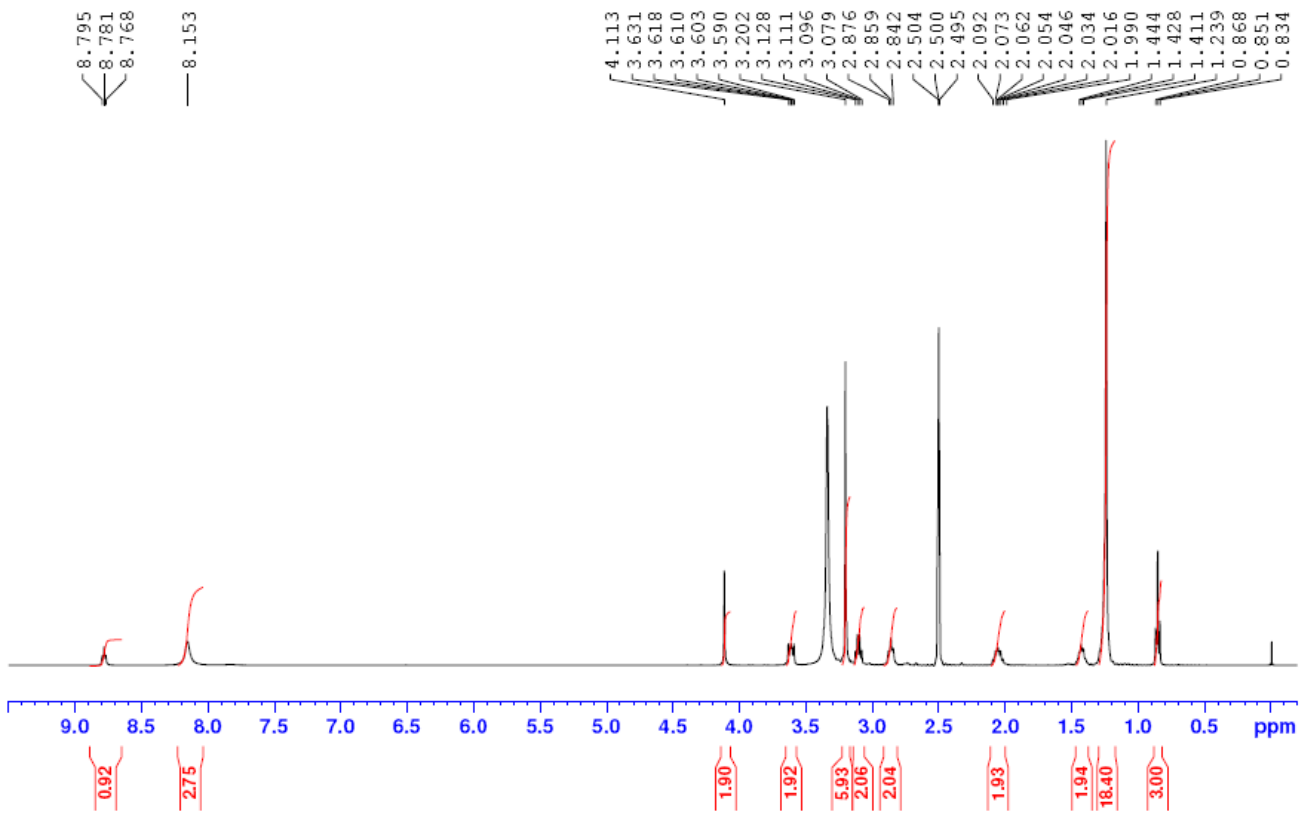

(10c)

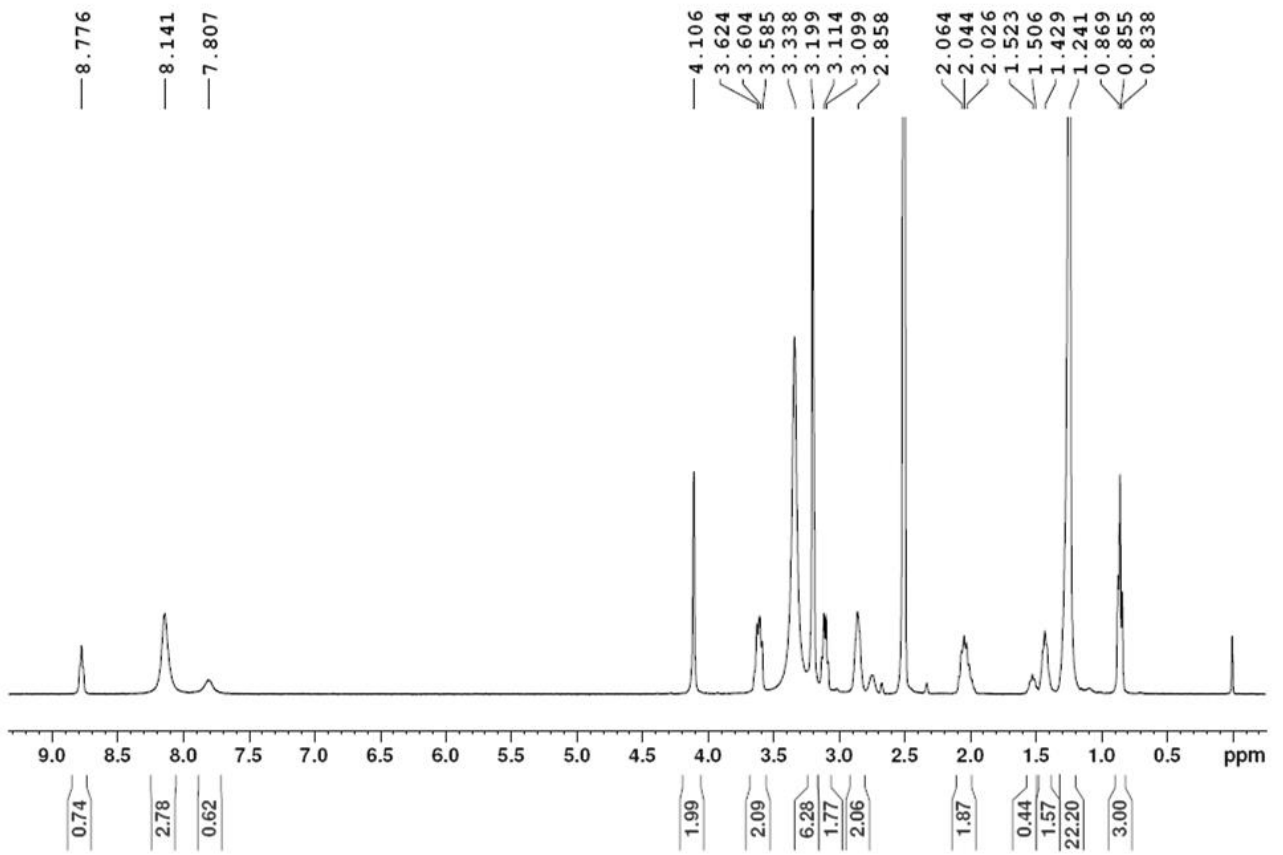

(1)

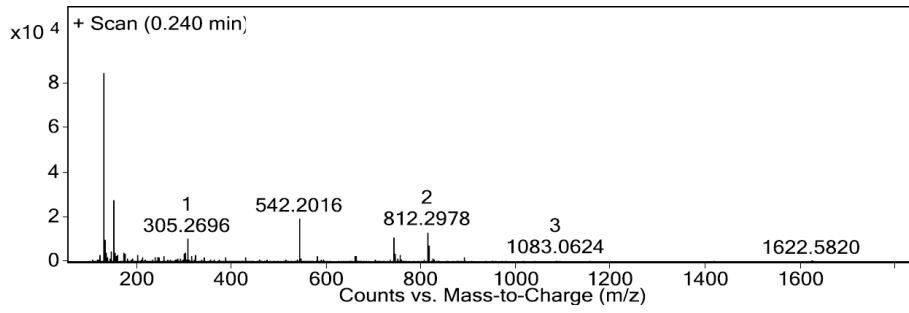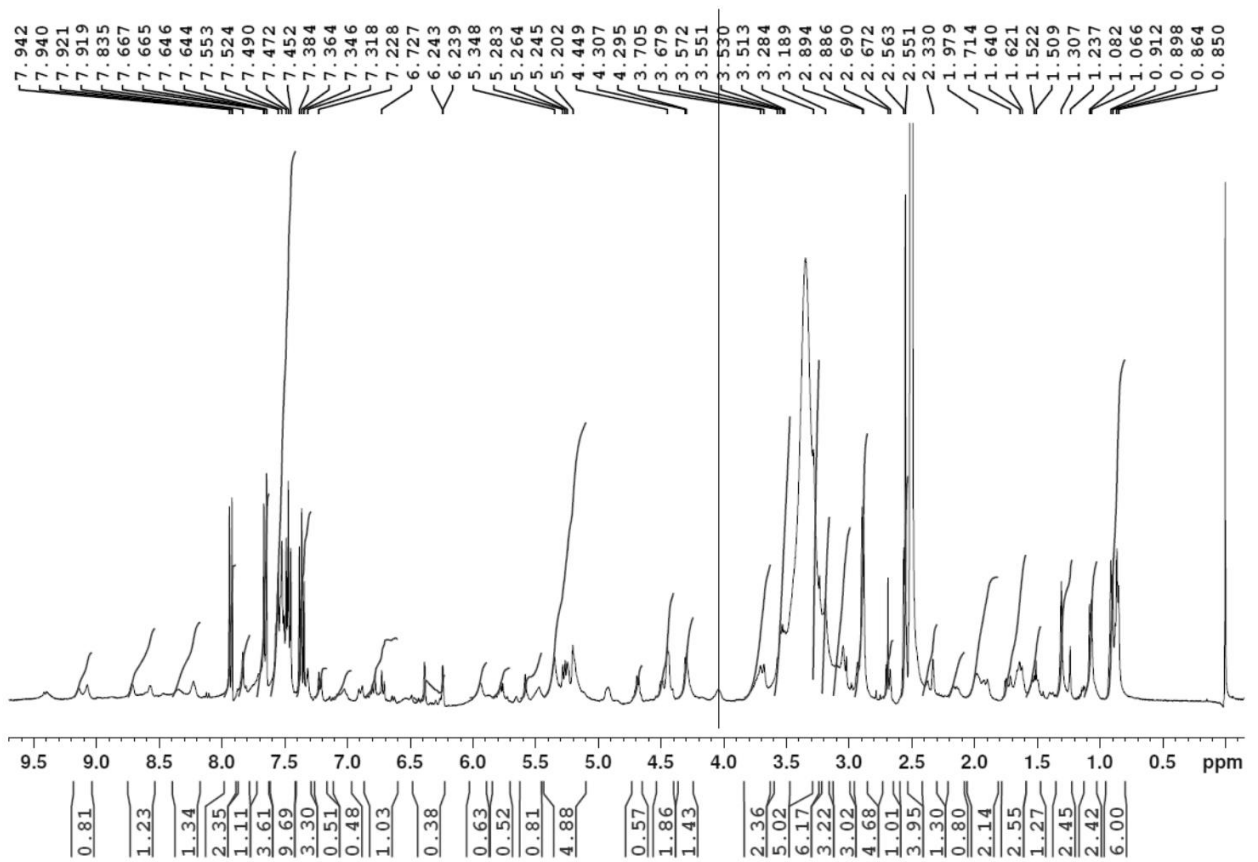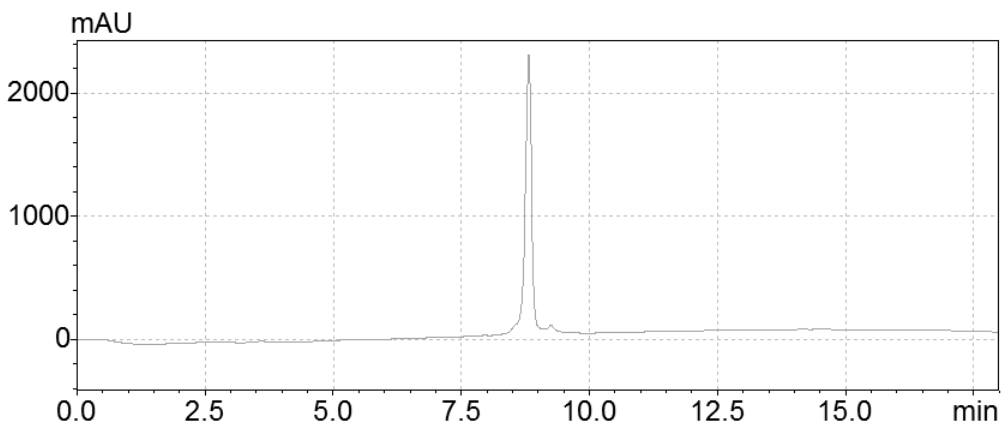

(2)

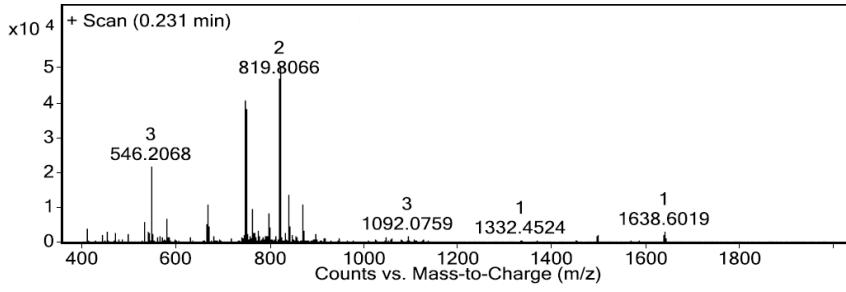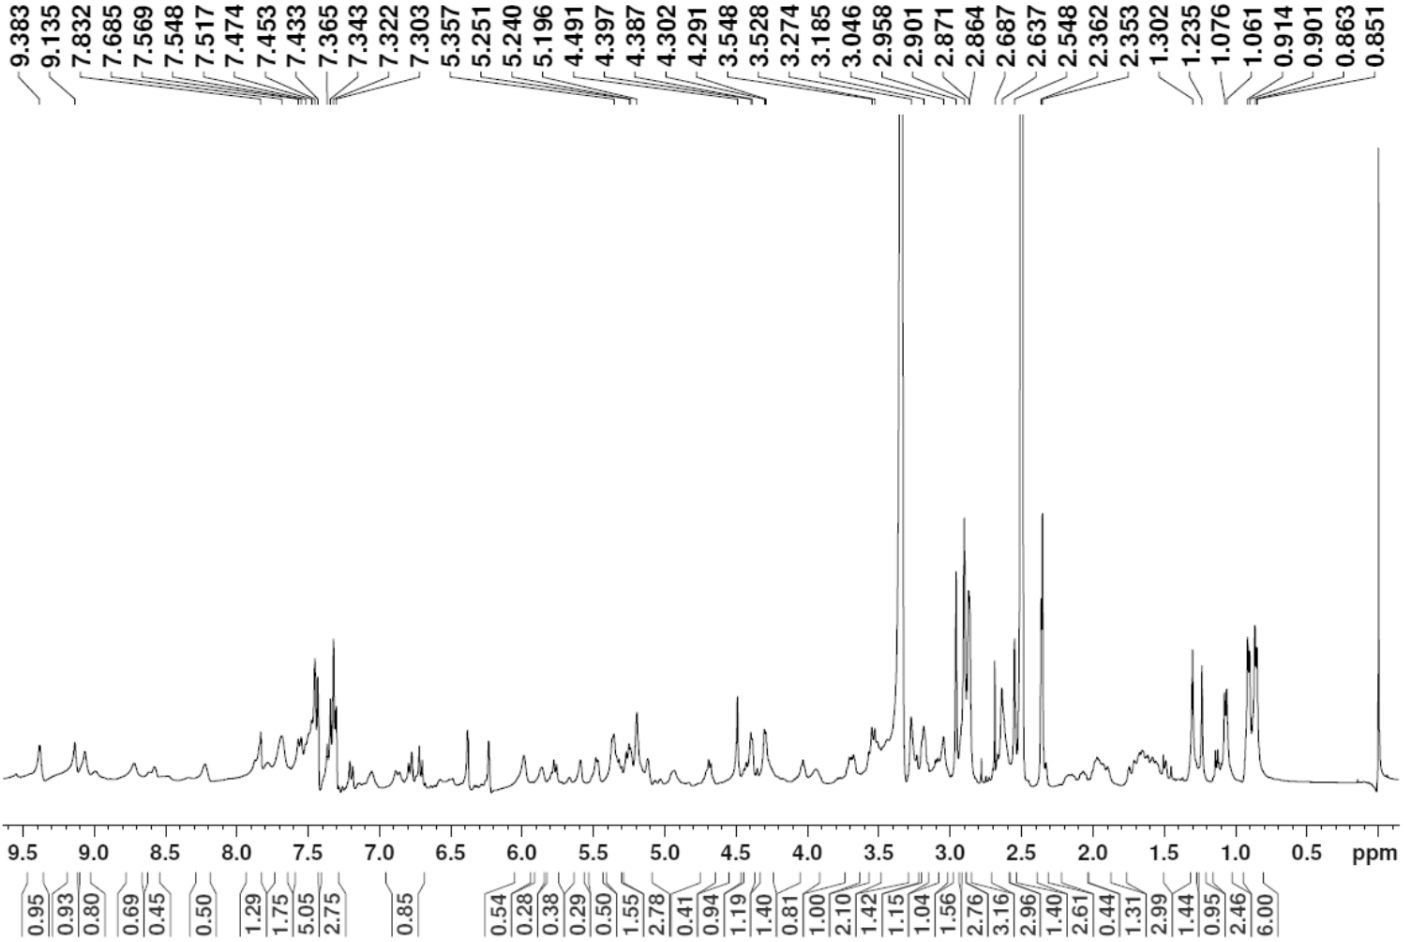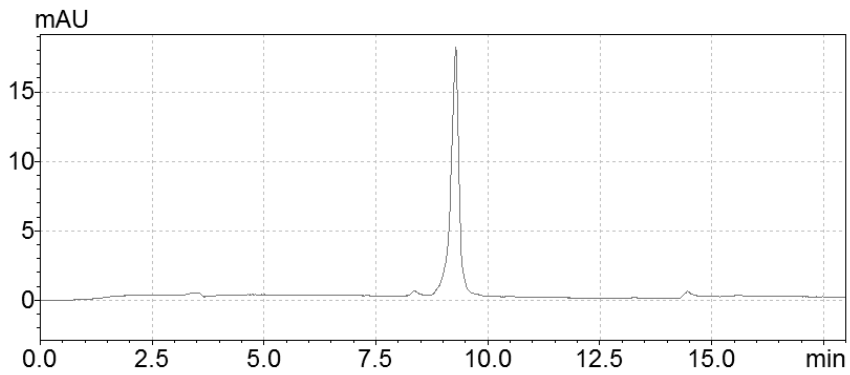

(3)

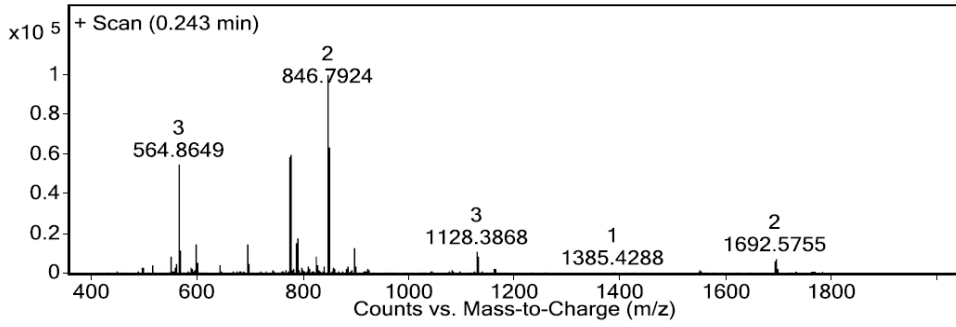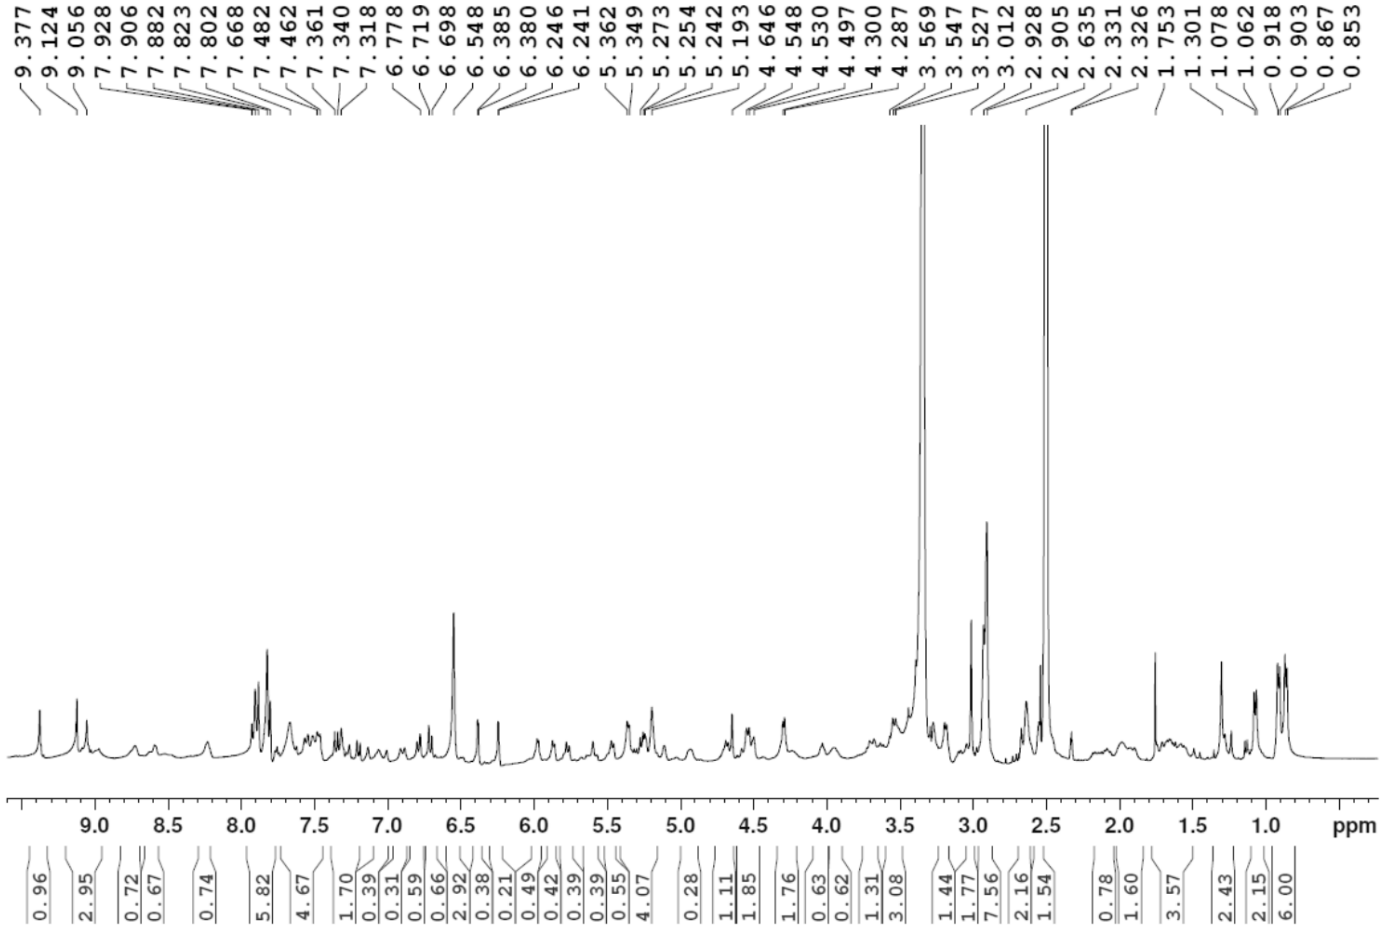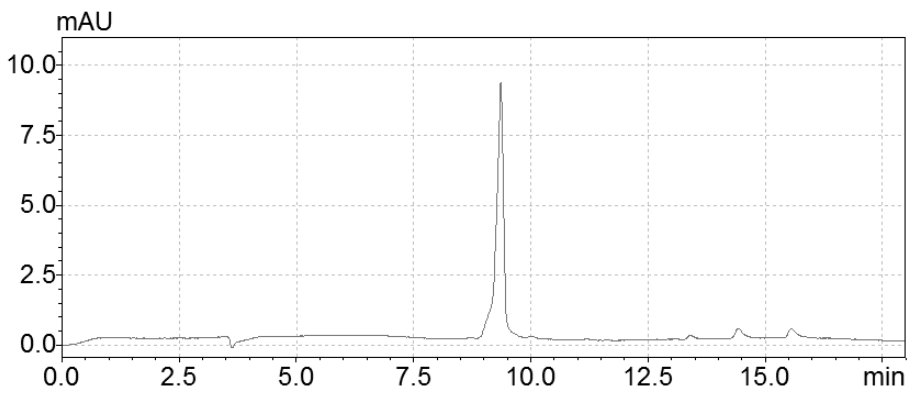

(4)

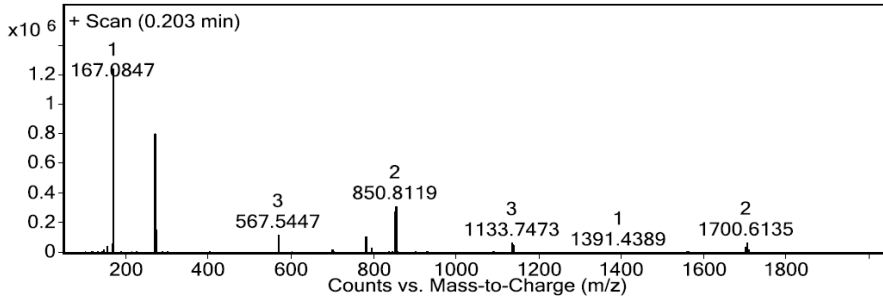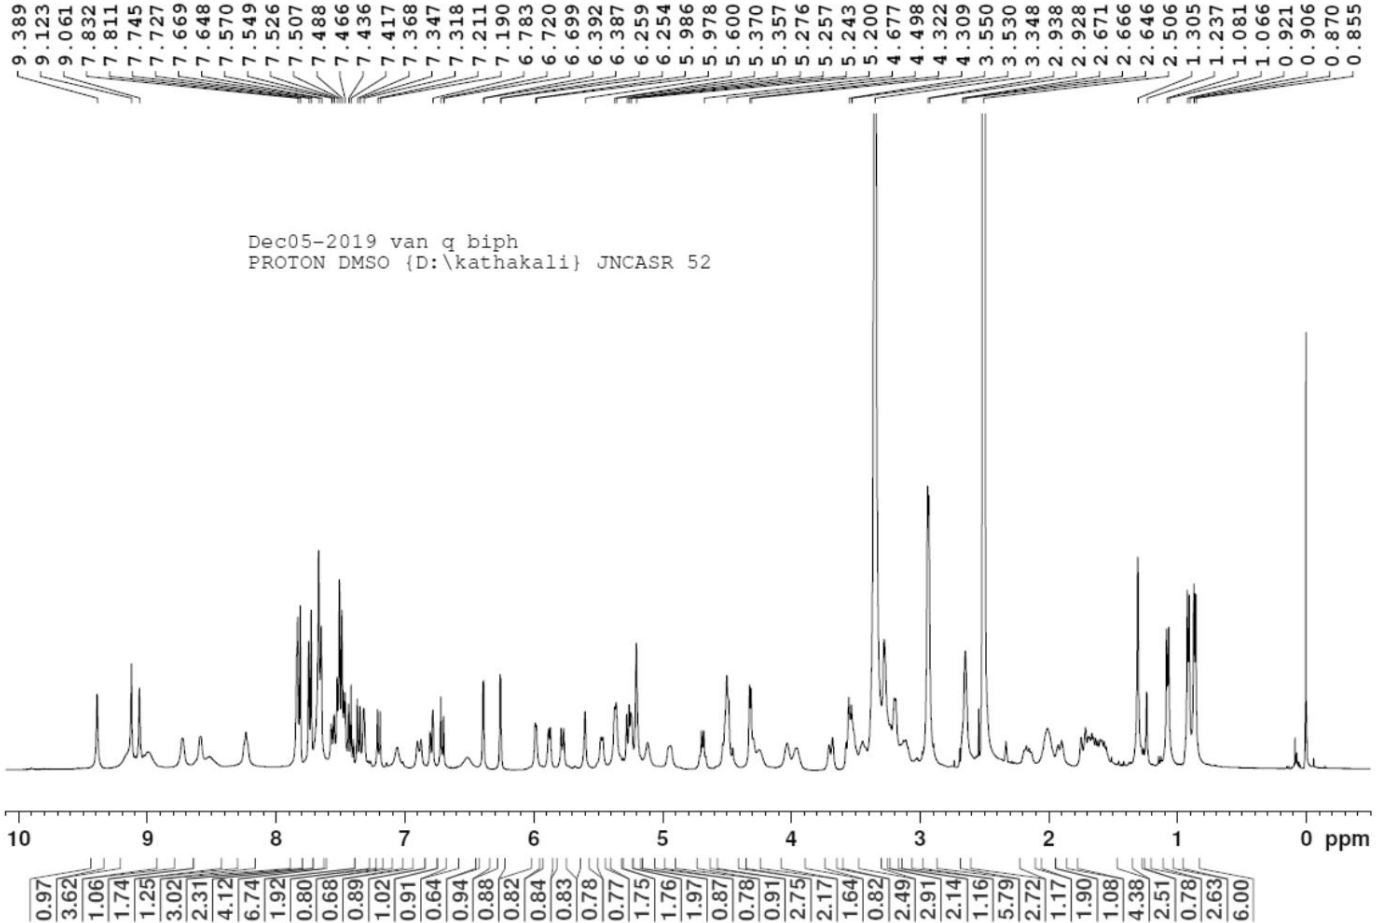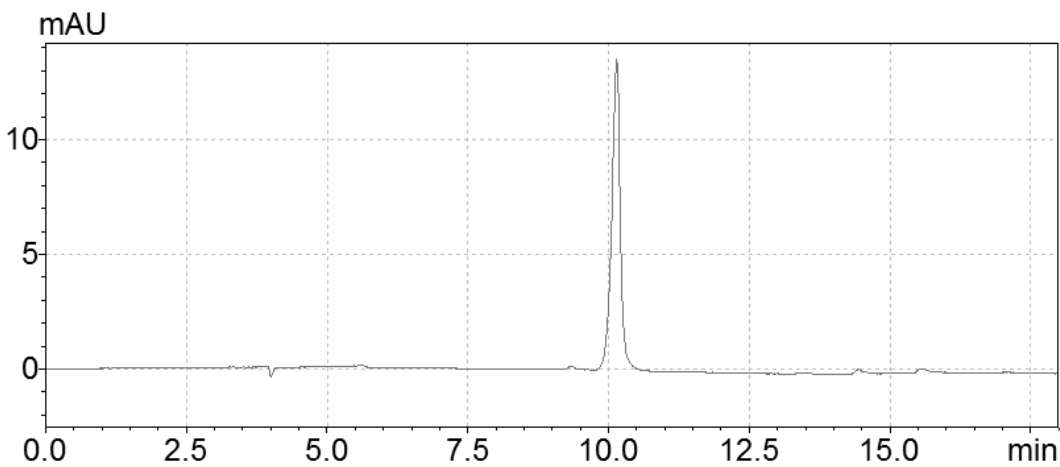

(5)

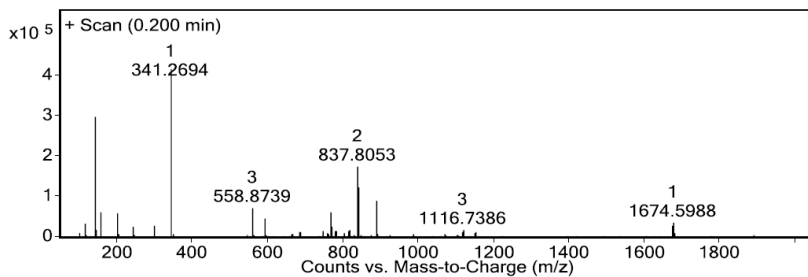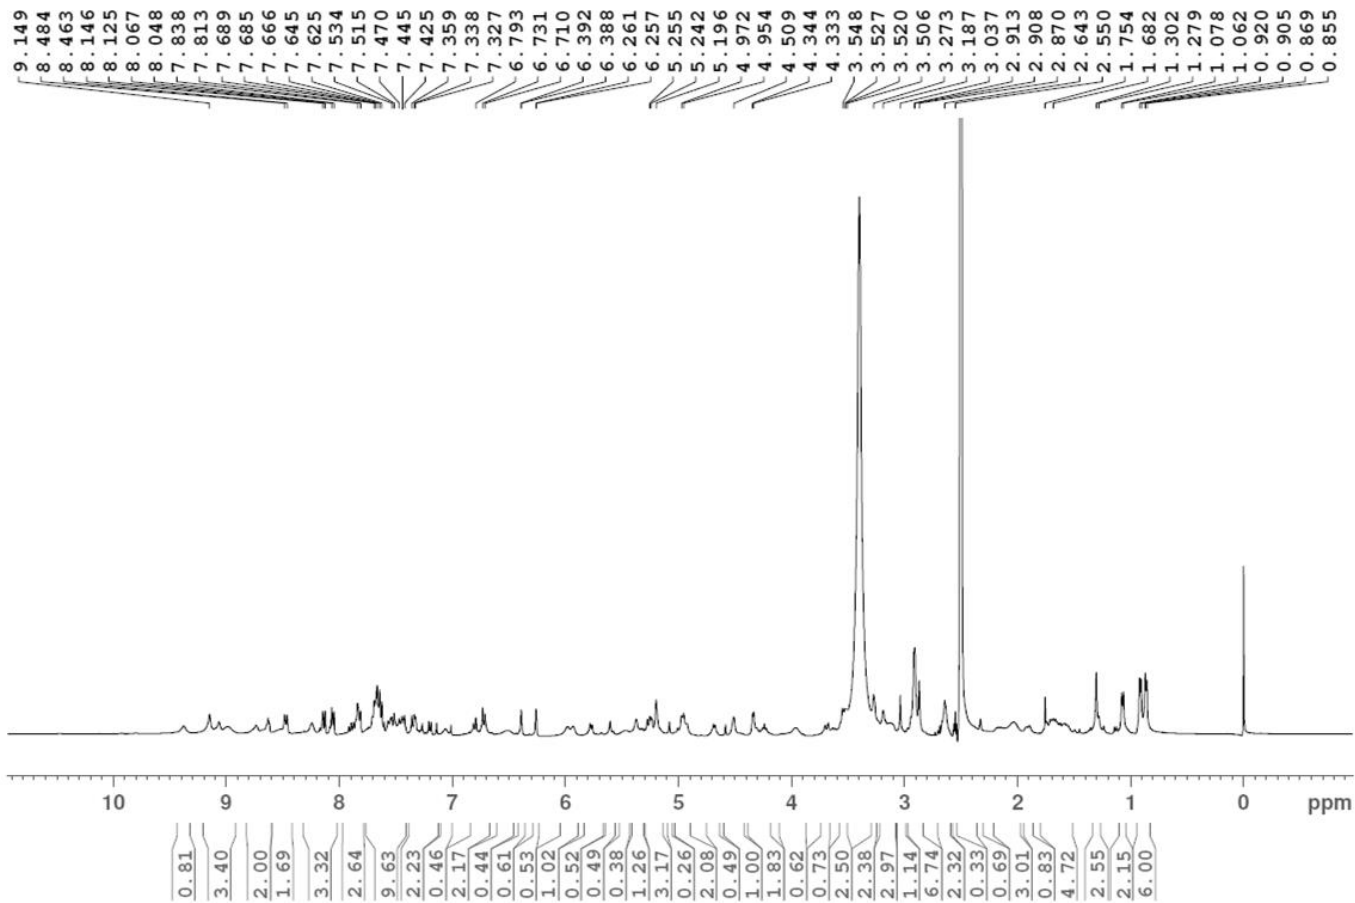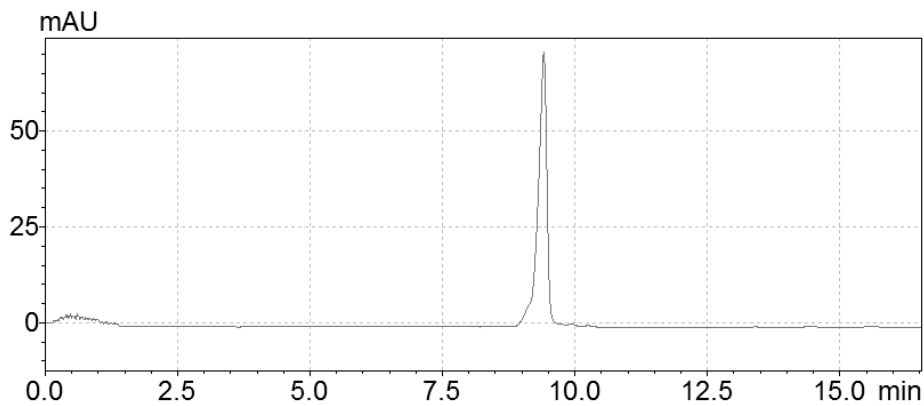

(6)

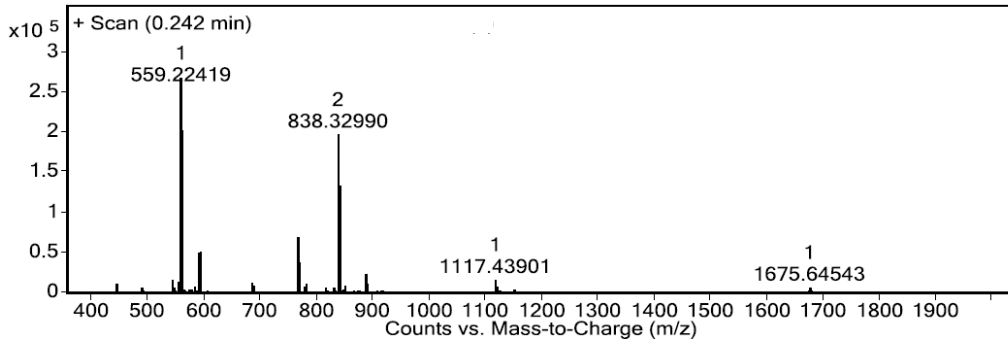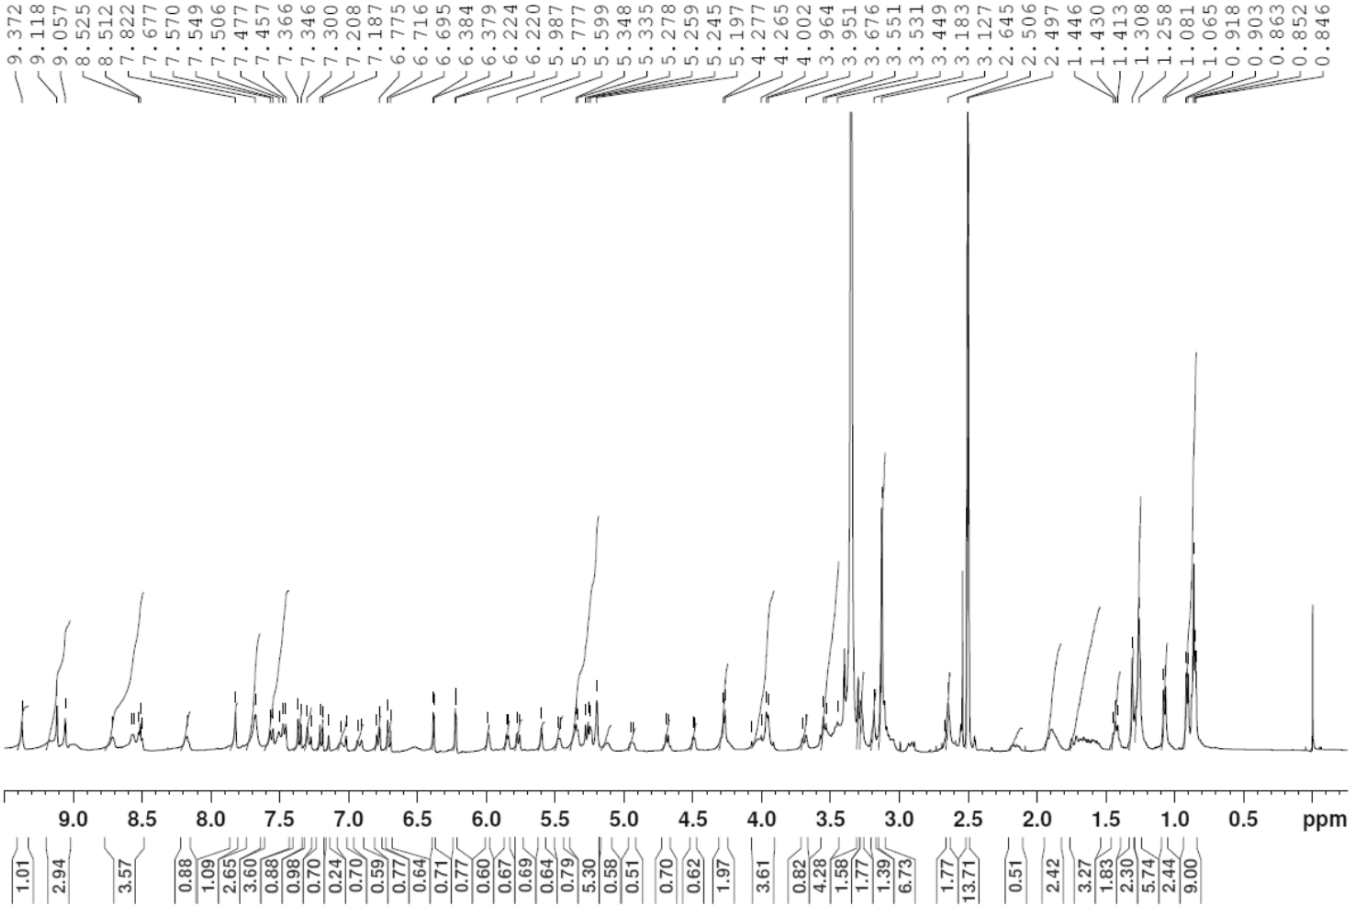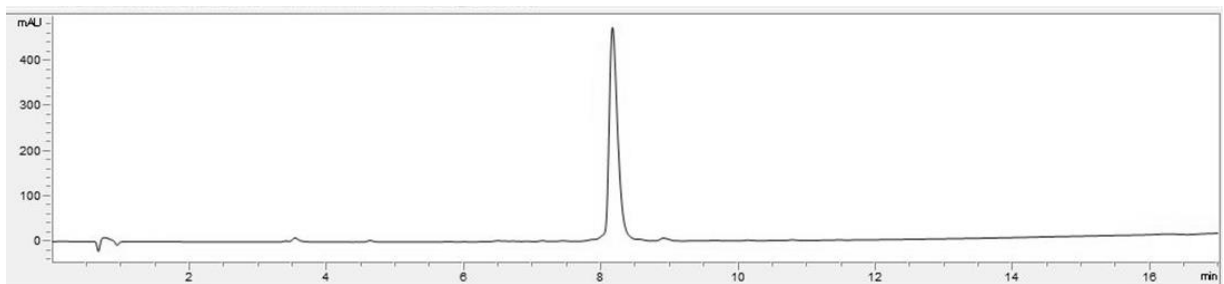



(7)

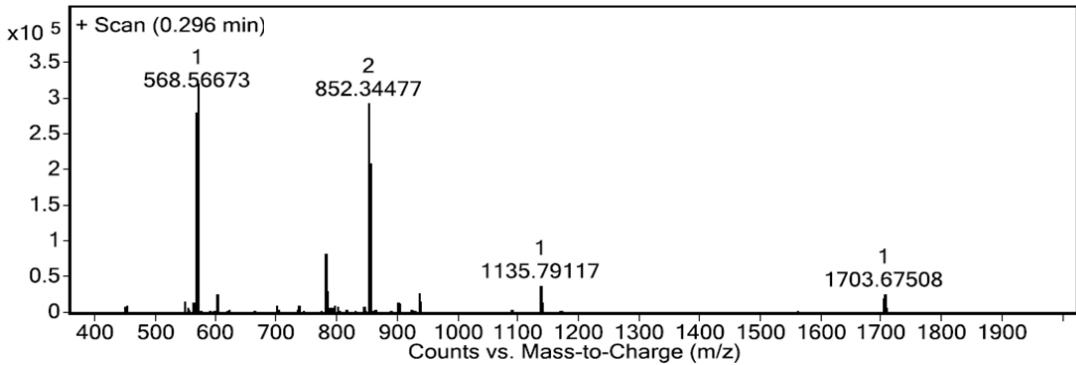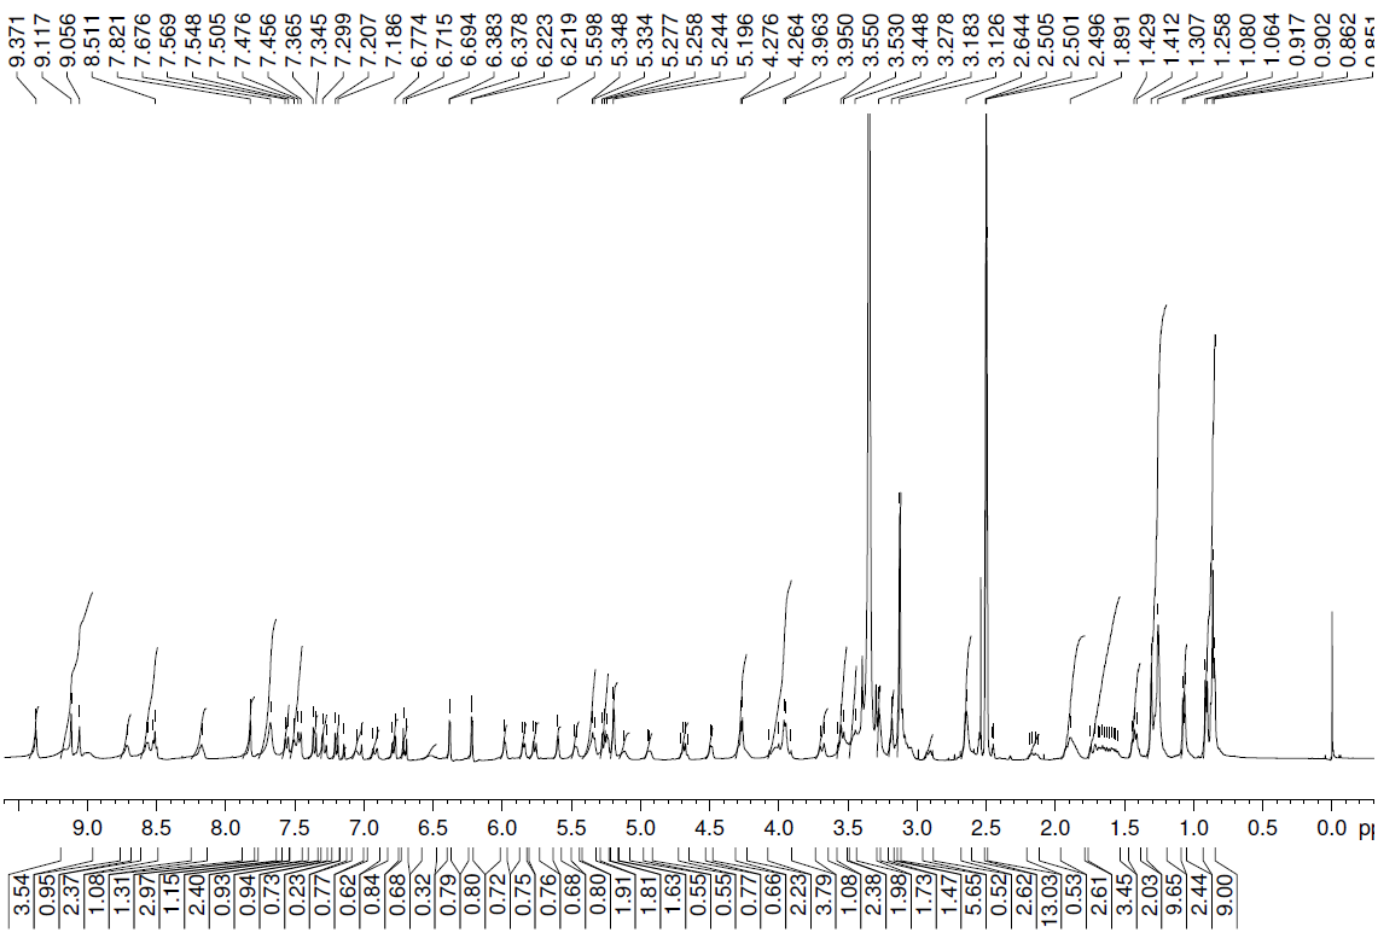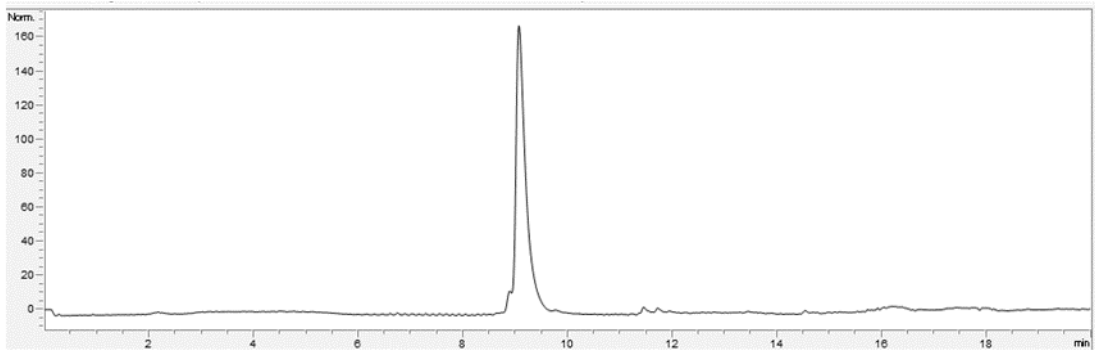

(8)

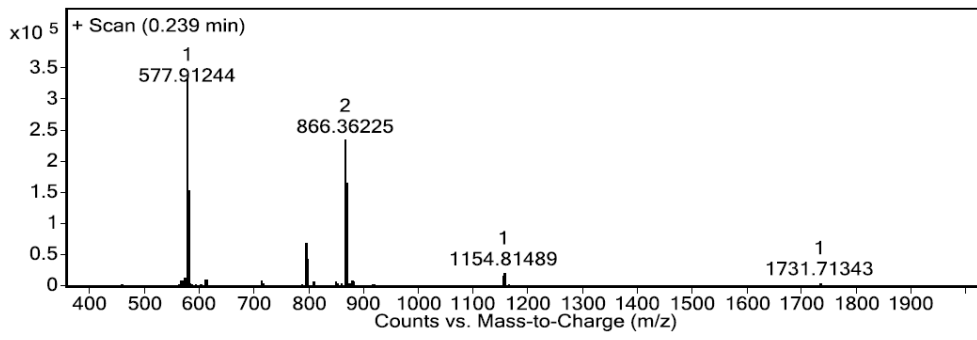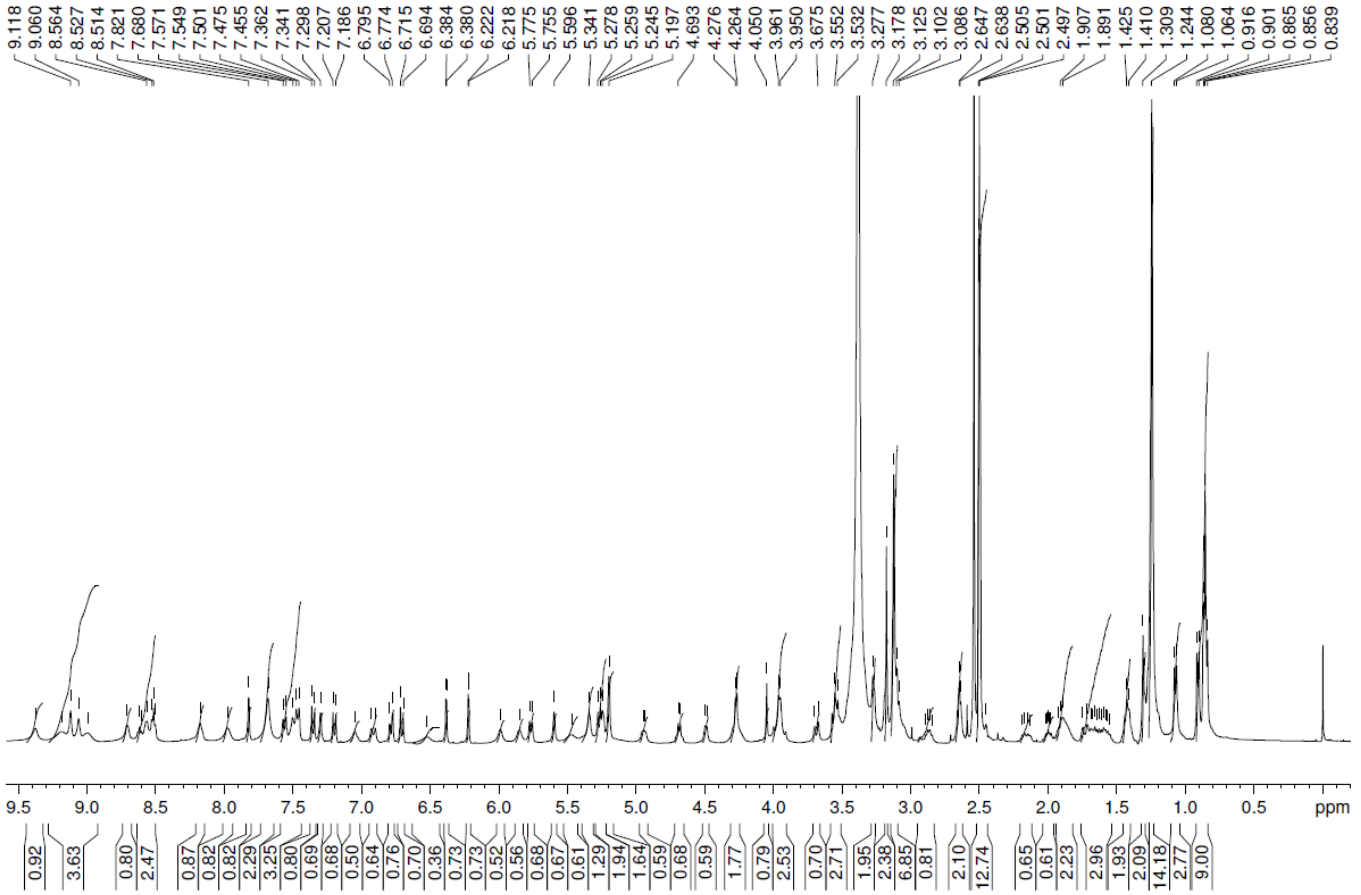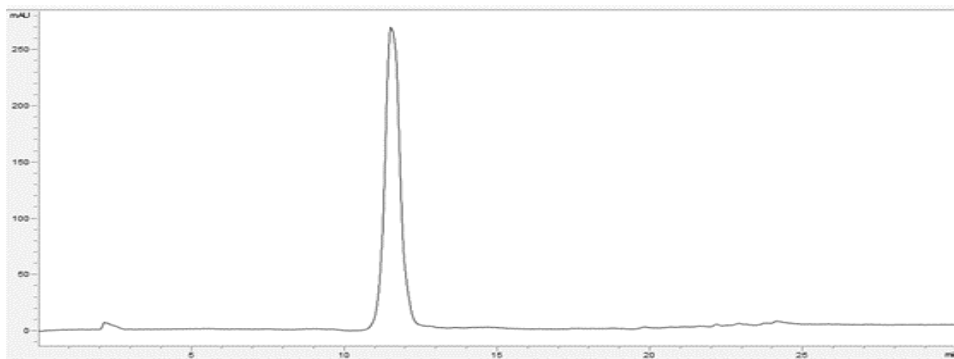

(9)

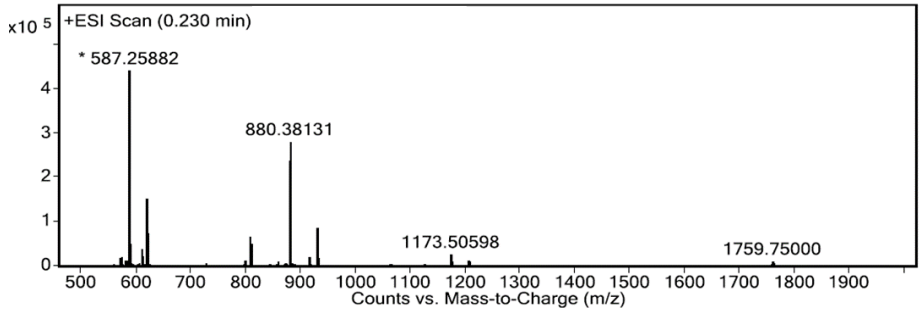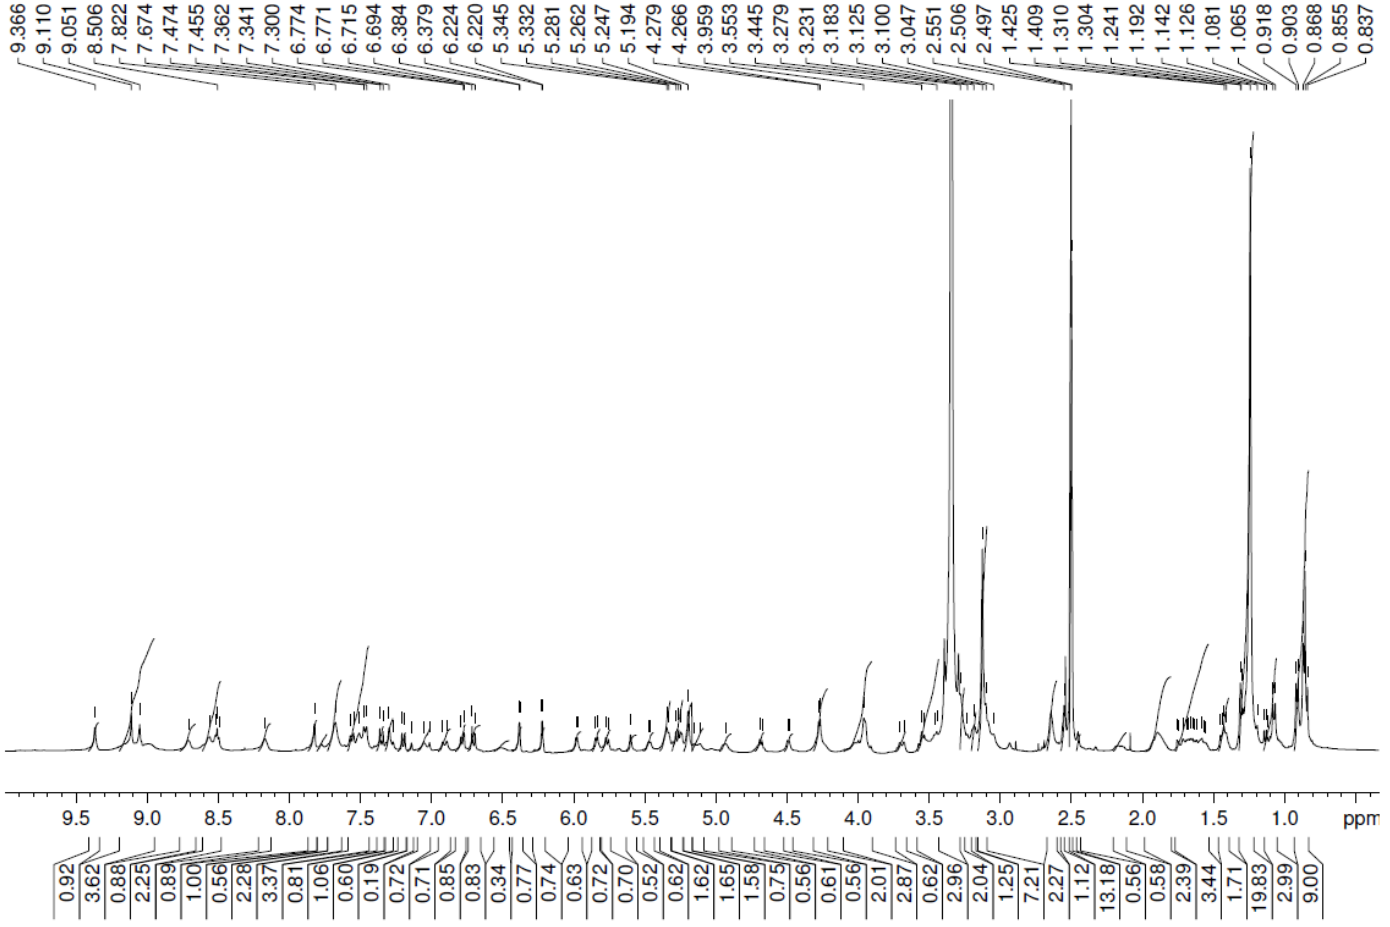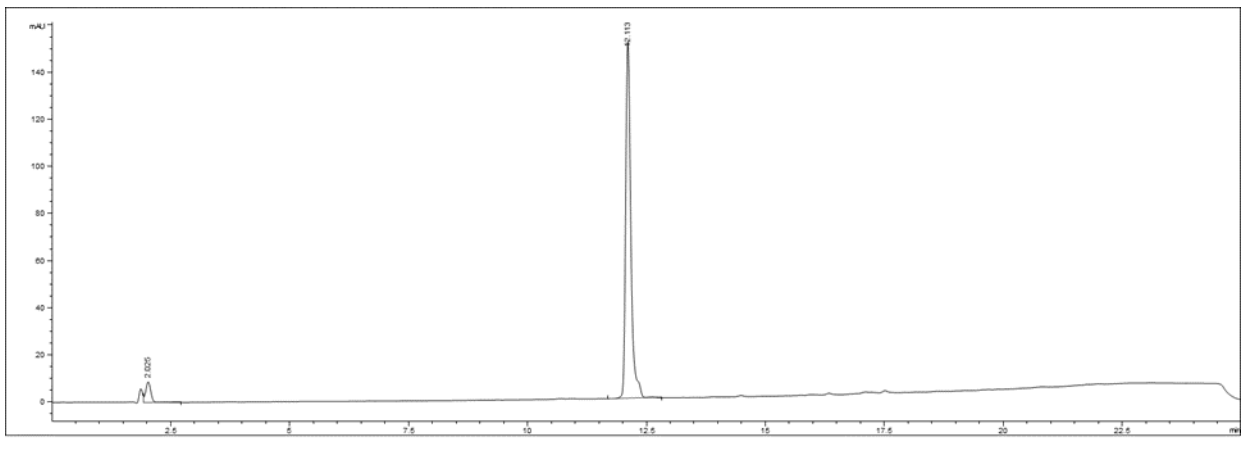

(10)

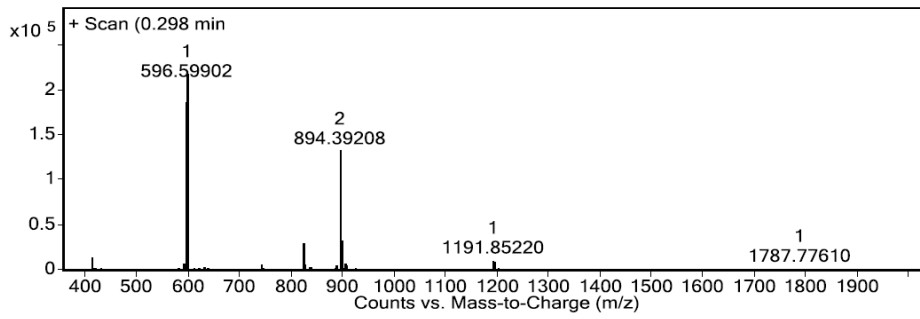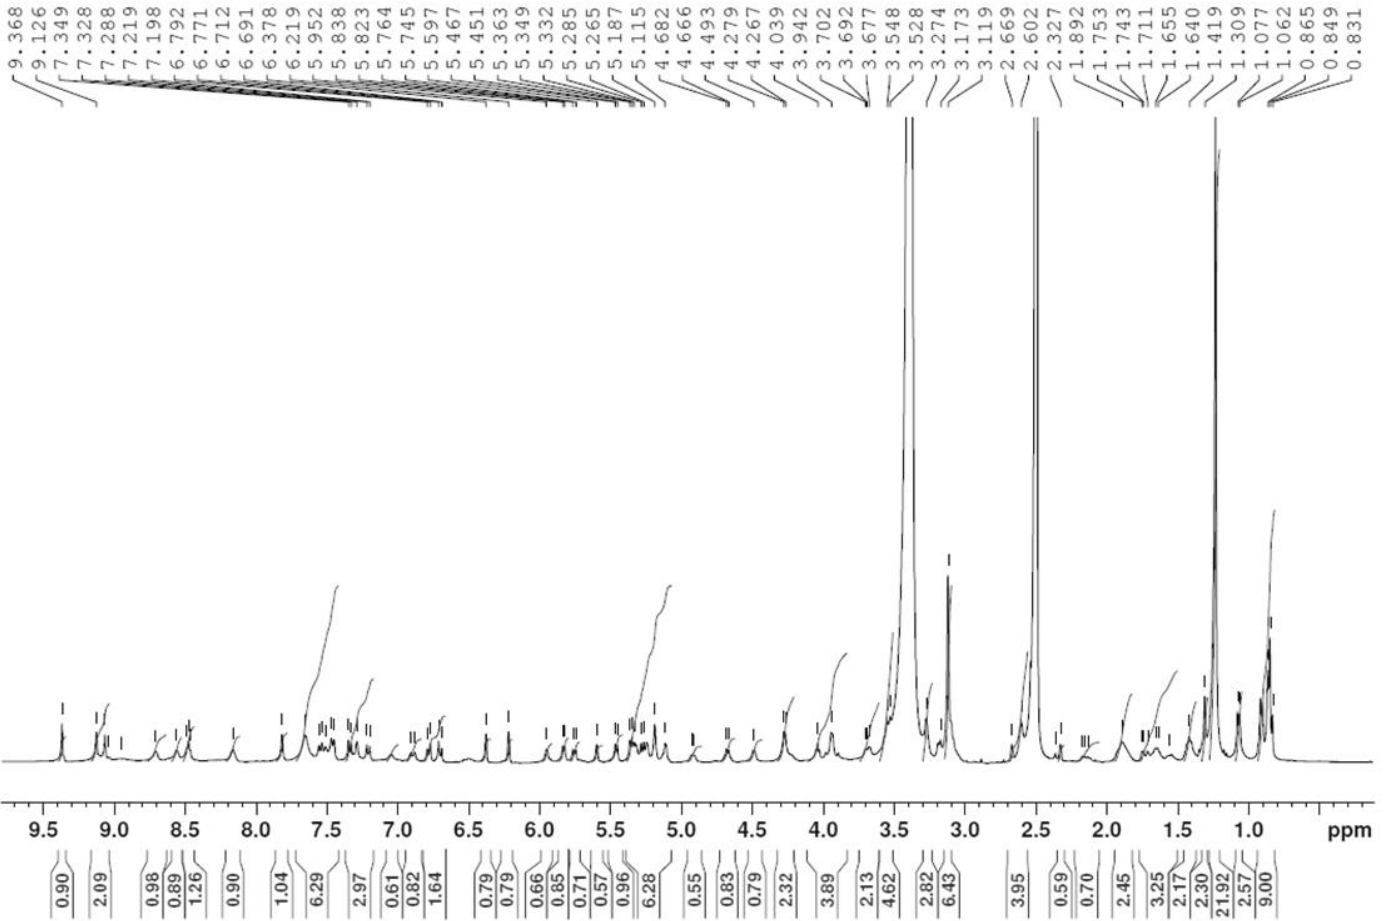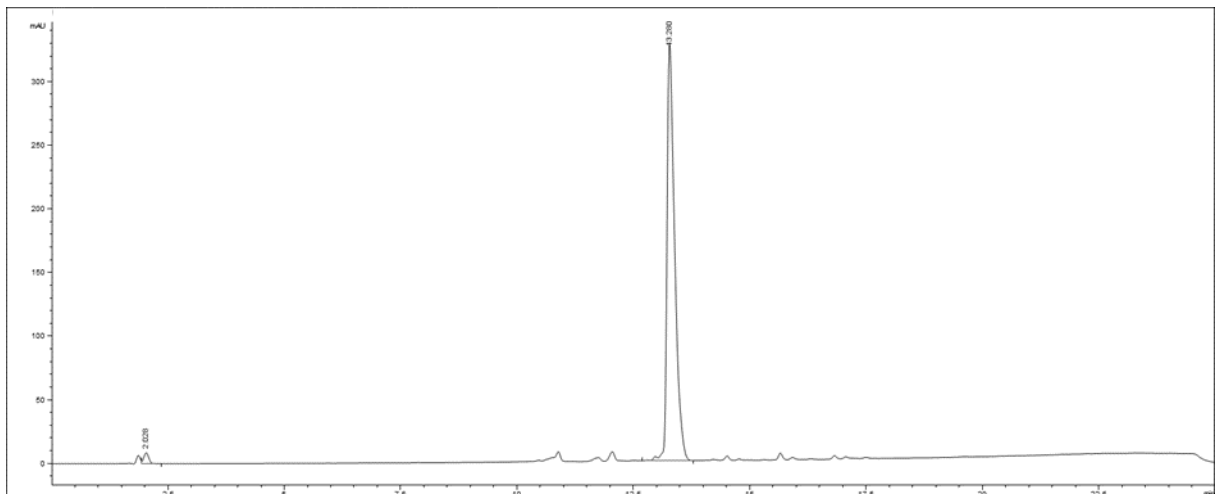

Supplement: d2sc05600c1.pdf [file d2sc05600c1.pdf]
